1 **Title**

2 Heterologous production of 1-tuberculosinyladenosine in *Mycobacterium kansasii* models  
3 pathoevolution towards the transcellular lifestyle of *Mycobacterium tuberculosis*.

4

5 **Authors**

6 Marwan Ghanem<sup>1,2,3,4,\*</sup>, Jean-Yves Dubé<sup>1,2,3,\*</sup>, Joyce Wang<sup>1,2,3,5</sup>, Fiona McIntosh<sup>1,2,3</sup>, Daniel  
7 Houle<sup>2</sup>, Pilar Domenech<sup>1,2,3</sup>, Michael B. Reed<sup>1,2,3</sup>, Sahadevan Raman<sup>6</sup>, Jeffrey Buter<sup>7</sup>, Adriaan J.  
8 Minnaard<sup>7</sup>, D. Branch Moody<sup>6</sup> and Marcel A. Behr<sup>1,2,3</sup>

9

10 **Affiliations**

11 1. Department of Microbiology and Immunology, Faculty of Medicine, McGill University,  
12 Montreal, Canada. 2. Infectious Disease and Immunity in Global Health Program, Research  
13 Institute of the McGill University Health Centre, Montreal, Canada. 3. McGill International TB  
14 Centre, Montreal, Canada. 4. Faculty of Medicine, American University of Beirut, Lebanon. 5.  
15 Department of Microbiology and Immunology, University of Michigan Medical School,  
16 Michigan, USA. 6. Division of Rheumatology, Immunity and Inflammation, Brigham and  
17 Women's Hospital, Harvard Medical School, Boston, United States of America. 7. Stratingh  
18 Institute for Chemistry, University of Groningen, 9747AG Groningen, The Netherlands.

19

20 **Running title:** 1-TbAd complementation in *M. kansasii*

21

---

\* These authors contributed equally. MG was placed first for contributing to the manuscript first.

22 **Author for correspondence:** Marcel Behr (marcel.behr@mcgill.ca)

23

24 **Byline:** Ghanem M\*, Dube JY\*, Wang J, McIntosh F, Houle D, Domenech P, Reed MB, Raman S,  
25 Buter J, Minnaard AJ, Moody DB and Behr MA. 2020. Heterologous production of 1-  
26 tuberculosinyladenosine in *Mycobacterium kansasii* models pathoevolution towards the  
27 transcellular lifestyle of *Mycobacterium tuberculosis*.

28

## 29 **ABSTRACT**

30 *Mycobacterium kansasii* is an environmental non-tuberculous mycobacterium that  
31 causes opportunistic tuberculosis-like disease. It is one of the most closely related species to  
32 the *M. tuberculosis* complex. Using *M. kansasii* as a proxy for the *M. kansasii*-*M. tuberculosis*-  
33 common ancestor, we asked whether introducing the *M. tuberculosis*-specific gene pair  
34 *Rv3377c*-*Rv3378c* into *M. kansasii* affects the course of experimental infection. Expression of  
35 these genes resulted in the production of an adenosine-linked lipid species, known as 1-  
36 tuberculosinyladenosine (1-TbAd), but did not alter growth *in vitro* under standard conditions.  
37 Production of 1-TbAd enhanced growth of *M. kansasii* under acidic conditions through a  
38 bacterial cell-intrinsic mechanism independent of controlling pH in the bulk extracellular and  
39 intracellular spaces. Production of 1-TbAd led to greater burden of *M. kansasii* in the lung of  
40 C57Bl/6 mice during the first 24 hours after infection and *ex vivo* infections of alveolar  
41 macrophages recapitulated this phenotype within the same time frame. However, in long-term  
42 infections, production of 1-TbAd resulted in impaired bacterial survival in both C57Bl/6 mice  
43 and *Ccr2*<sup>-/-</sup> mice. We have demonstrated that *M. kansasii* is a valid surrogate of *M. tuberculosis*

44 to study virulence factors acquired by the latter organism, yet shown the challenge inherent to  
45 studying the complex evolution of mycobacterial pathogenicity with isolated gene  
46 complementation.

47

## 48 **IMPORTANCE**

49 This work sheds light on the role of the lipid 1-tuberculosinyladenosine in the evolution  
50 of an environmental ancestor to *M. tuberculosis*. On a larger scale, it reinforces the importance  
51 of horizontal gene transfer in bacterial evolution and examines novel models and methods to  
52 provide a better understanding of the subtle effects of individual *M. tuberculosis*-specific  
53 virulence factors in infection settings that are relevant to the pathogen.

54

## 55 **INTRODUCTION**

56 *M. tuberculosis* virulence factors have been established by genetic knock-out and  
57 complementation within the pathogen, producing evidence of an attenuation of virulence in *ex*  
58 *vivo* or *in vivo* experimental infections (1, 2). While numerous virulence-associated loci have  
59 been identified with this approach, the majority of these are intact in the genomes of non-  
60 transmissible environmental mycobacteria, such as *M. kansasii* (3-6). *M. kansasii* is readily  
61 isolated in clinical settings from pulmonary infections and we have previously shown that it can  
62 be studied in an experimental lung model (3). However, although it causes TB-like disease, *M.*  
63 *kansasii* infections disproportionately affect patients with underlying pulmonary diseases or  
64 immunosuppression, and there is no evidence supporting its transmission between individuals  
65 (7, 8). The conservation of many virulence factors across *M. tuberculosis* and *M. kansasii*,

66 including the ESX-1 secretion system, PhoPR 2-component system and DosR/S/T regulon  
67 suggest that they play a role in a broader survival strategy used by mycobacteria (9-11). For  
68 example, some of these factors may be needed for survival of *M. kansasii* within free-living  
69 phagocytic amoeba, but their presence does not provide *M. kansasii* with the pathogenic  
70 capabilities of *M. tuberculosis* inside human hosts (12). Consequently, there is currently an  
71 incomplete understanding of how *M. tuberculosis* emerged as a human-adapted professional  
72 pathogen.

73  
74         There has been a growing body of evidence over the past decade showing that HGT  
75 events have happened during mycobacterial speciation and are associated with the step-wise  
76 emergence of pathogenic species (13-16). Fifty-five genes have been acquired by *M.*  
77 *tuberculosis* since its divergence from the *M. kansasii*-*M. tuberculosis* common ancestor  
78 (MKMTCA) (13). Although many of these HGT genes have no postulated function, the *Rv3376*-  
79 *Rv3378c* genomic island uniquely present in *M. tuberculosis* is known to encode a class II  
80 terpene cyclase (*Rv3377c*) and a tuberculosinyl transferase (*Rv3378c*). Together, the two  
81 enzymes are responsible for the conversion of geranylgeranyl pyrophosphate (GGPP) into the  
82 recently identified *M. tuberculosis*-specific lipid 1-tuberculosinyladenosine (1-TbAd), which is a  
83 potential diagnostic molecular marker for TB disease (17-20). 1-TbAd further undergoes a  
84 chemical rearrangement, known as the Dimroth reaction, to generate  $N^6$ -TbAd (18). While  
85 GGPP is found in both species and used as an intermediate in the biosynthesis of 1-TbAd by *M.*  
86 *tuberculosis* (17, 19), it is part of the biosynthetic pathway for the production of carotenoid  
87 pigments of *M. kansasii*, giving its characteristic yellow colour (21).

88

89           We previously reported the important role of 1-TbAd in protecting *M. tuberculosis* from  
90 phagosomal acidification inside macrophages (22). In the present work, we have characterized  
91 the effect of 1-TbAd production in *M. kansasii* complemented with *Rv3377c* and *Rv3378c*. Here,  
92 we show that *in vitro* growth kinetics and colony morphology in liquid and on solid media are  
93 unaltered by *Rv3377c-Rv3378c* expression. 1-TbAd confers a growth advantage in acidic media  
94 compared to wild-type *M. kansasii*, which we further demonstrated to be independent of  
95 cytosolic and culture medium pH control, suggesting a compartmental mechanism of protection  
96 for the bacterium. *Rv3377c-Rv3378c* provided an early advantage to bacterial replication during  
97 pulmonary infection in mice, consistent with enhanced survival in alveolar macrophages.  
98 However, the *M. kansasii::Rv3377-78c* was outcompeted by the wild-type during long-term  
99 murine infection. This study demonstrates that we can use *M. kansasii* as a proxy of the  
100 MKMTCA to explore the complex evolution of *M. tuberculosis*. It also shows that gene  
101 acquisition likely provided advantages for specific contexts, including a possible and unexpected  
102 role in survival within alveolar macrophages during early stages of infection, despite tradeoffs  
103 or challenges under other circumstances requiring further evolution to overcome.

104

## 105 **RESULTS**

### 106 **Expression of *Rv3377c-Rv3378c* in *M. kansasii* leads to 1-TbAd production**

107           We introduced the *M. tuberculosis*-specific gene pair *Rv3377c-Rv3378c* into the *M.*  
108 *kansasii* genome within an integrative plasmid containing hygromycin resistance to produce *M.*  
109 *kansasii::Rv3377-78c* (see methods). As a control for subsequent experiments, an integrative

110 'empty vector' (EV) was employed. After labelling with  $^{14}\text{C}$ -adenosine and lipid extraction using  
111 chloroform and methanol, radio-thin-layer chromatography (TLC) was used to detect  
112 adenosine-linked lipids in *M. kansasii*:Rv3377-78c clones for comparison to *M. tuberculosis*  
113 strain H37Rv (Fig. 1a). Conventional molybdenum-based sprays followed by charring broadly  
114 detected all lipids as a loading control, suggesting a lack of broad lipid changes detectable at  
115 the TLC level after gene transfer (Fig. 1b). Whereas uncomplemented bacterial extracts showed  
116 material at the origin and one weak band in radio-TLC, Rv3377c-Rv3378c complementation  
117 generated at least 5 additional lipid species. Three of these novel lipids co-migrated with  
118 compounds from *M. tuberculosis* strain H37Rv. Both results strongly suggested the successful  
119 genetic transfer of *M. tuberculosis*-associated adenosine-linked lipids to *M. kansasii*. 5%  
120 phosphomolybdic acid reagent (PMA) staining showed that similar amounts of total lipids were  
121 spotted for each *M. kansasii* sample (Fig. 1b).

122  
123 High-performance liquid chromatography-mass spectrometry (HPLC-MS) was used to  
124 chemically identify the compounds produced by *M. kansasii*:Rv3377-78c, in which the  
125 expected retention of 1-TbAd (22.7 min) and  $N^6$ -TbAd (5.8 min) were known (Fig. 1c-g).  
126 Whereas the *M. kansasii*:EV control did not release compounds that comigrated with either 1-  
127 TbAd or  $N^6$ -TbAd, *M. kansasii*:Rv3377-78c produced high intensity ( $6.7\text{-}7.0 \times 10^6$  counts) signals  
128 ( $m/z$  540.354) matching the expected retention time and mass ( $m/z$  540.3544) of the proton  
129 adducts of 1-TbAd. The extractions were performed at a range of pH (4.5 – 7.4) since both the  
130 Dimroth reaction that generates  $N^6$ -TbAd and the capture of lysosomotropic agents are  
131 sensitive to pH, as previously explained (18, 22, 23). Similar to results with *M. tuberculosis* in

132 which 9 % of the TbAd pool was released (22), we observed stronger (~ 10-fold) signals in the  
133 pellet compared to the supernatant. However, there was no clear impact of altering pre-  
134 extraction pH for two hours to the release nor relative abundance of 1-TbAd and  $N^6$ -TbAd, and  
135 thus such effects, if existent, did not occur under the tested conditions (Fig. 1c-g). Similar to  
136 patterns observed from *M. tuberculosis*, more 1-TbAd than  $N^6$ -TbAd was recovered from *M.*  
137 *kansasii::Rv3377-78c* (Fig. 1f-g). In 4 tested cultures of *M. kansasii::Rv3377-78c*, 1-TbAd  
138 represented 0.125 +/- 0.04% of the total lipid mass (vs. 0.76% in *M. tuberculosis*) (data not  
139 shown).

140

#### 141 **1-TbAd production does not change visible characteristics of *M. kansasii* in conventional** 142 **media**

143 To characterize any overt phenotypic effects of 1-TbAd production on *M. kansasii*, we  
144 assessed its influence on *in vitro* characteristics of the bacterial culture. *M. kansasii::Rv3377-*  
145 *78c* grew similarly to wild-type *M. kansasii* and *M. kansasii::EV* in 7H9 (Fig. 2a) and on 7H10  
146 agar (Fig. 2b). Carotenoid pigments get integrated into bacterial cell membranes, maintain  
147 membrane fluidity and provide support against external stressors (24). Since the production of  
148 1-TbAd requires the same intermediate GGPP as that of the yellow pigment that *M. kansasii*  
149 produces when exposed to light, we then tested *M. kansasii::Rv3377-78c*'s ability to turn yellow  
150 after light exposure in order to rule out the possibility that a pigment-related phenomenon  
151 might affect our outcomes (Fig. 2b). *M. kansasii::Rv3377-78c* retained photochromogenic  
152 abilities by turning yellow after exposure to light at room temperature within the same  
153 timeframe as *M. kansasii::EV*.

154

155 Congo Red is an amphiphilic dye that binds to the mycobacterial cell membrane. When  
156 grown on Congo Red-containing 7H10 plates, different mycobacteria retain the dye distinctly,  
157 and this feature has been associated with differences in the interactions of bacterial cells within  
158 the colony (25). In this study, *M. tuberculosis* absorbed the dye and became red, while *M.*  
159 *kansasii* colonies remained white on the plate. Since 1-TbAd is found on the cell surface and has  
160 an amphipathic character (17), we tested the effect of its production on intra-colony bacterial  
161 interactions of *M. kansasii::Rv3377-78c*. Visual inspection of colonies (Fig. 2c) and absorbance  
162 at 488nm (Fig. 2d) showed no difference in retention of Congo Red between *M. kansasii::EV*  
163 and *M. kansasii::Rv3377-78c*.

164

### 165 **1-TbAd production enhances growth of *M. kansasii* in acidic media**

166 The ability to survive in mildly acidic environments is a key feature of mycobacteria,  
167 both environmental and pathogenic (26, 27). It was recently shown that 1-TbAd production  
168 confers a growth advantage over a pH range (5.0-5.4) comparable to that of an activated  
169 phagolysosome, which is not tolerated by most bacteria (22). As 1-TbAd can be shed  
170 extracellularly to de-acidify the phagosomal environment as seen in *M. tuberculosis*, we  
171 hypothesized that the production of 1-TbAd by *M. kansasii::Rv3377-78c* may modulate media  
172 pH (22). As expected, *M. kansasii::Rv3377-78c* was able to grow in lower pH than *M.*  
173 *kansasii::EV* in 7H9 culture media (Sup. Fig. 1). However, at 8 and 17 days post inoculation, both  
174 *M. kansasii::EV* and *M.kansasii::Rv3377-78c* slightly increased the pH of the media where there  
175 was bacterial growth, and to a similar extent (Fig. 3). Therefore, although we observed



176 enhanced growth with *M. kansasii*::Rv3377-78c compared to *M. kansasii*::EV, we could not  
177 demonstrate a causative role for 1-TbAd raising the extracellular pH of the culture media under  
178 these conditions.

179

### 180 **Synthetic 1-TbAd does not directly enhance growth of *M. kansasii***

181 Prior work with *M. tuberculosis* estimated that 1-TbAd might naturally accumulate to  
182  $\mu\text{M}$  concentrations in phagosomes, and 5-20  $\mu\text{M}$  1-TbAd alters lysosomal pH and morphology in  
183 human macrophages (22). The proposed lysosomotropic mechanism requires that 1-TbAd  
184 access a low pH compartment where the uncharged conjugate base binds protons to raise pH  
185 and regenerate a concentration gradient that promotes further entry of uncharged conjugate  
186 base to the acidic compartment. Whereas this mechanism can relieve pH stress on the  
187 bacterium, the major alternative, which is not exclusive of lysosomotropism, is that 1-TbAd  
188 directly signals for bacterial growth and division. To distinguish these mechanisms we  
189 ‘chemically complemented’ WT *M. kansasii* with synthetic 1-TbAd and  $N^6$ -TbAd added externally  
190 in media. In this experiment TbAd (already carrying a proton) should not alter pH, but would  
191 contact bacteria in high concentrations. As expected the addition of synthetic 1-TbAd ( $pK_a \sim$   
192 8.5) and  $N^6$ -TbAd ( $pK_a \sim 3.8$ ) did not alter the pH of the 7H9 media (Sup. Fig. 2a). Next we  
193 inoculated *M. kansasii* into pH-adjusted 7H9 broth (pH 4.0, 4.8, 5.0, 5.2, 5.4, 6.7,) containing 1,  
194 5, 10 or 20  $\mu\text{M}$  TbAd and monitored growth over 16 days (Fig. 4 and Sup. Fig. 2b). With  
195 increasing doses of 1-TbAd or its isomer  $N^6$ -TbAd, we did not observe any promotion of *M.*  
196 *kansasii* growth in normal nor acidic 7H9 broth (Fig. 4 and Sup. Fig 1b). In fact, 1-TbAd partially  
197 inhibited growth at 20  $\mu\text{M}$ , the highest dose tested, at normal pH. These data demonstrated

198 that the protection from low pH in 7H9 culture media afforded by *Rv3377c-Rv3378c*  
199 complementation in *M. kansasii* is cell-intrinsic, promotes growth only at low pH and does not  
200 occur with direct exposure to protonated TbAd.

201

### 202 **1-TbAd does not maintain bulk cytosolic pH to enhance *M. kansasii* growth in low pH media**

203 We aimed to identify whether 1-TbAd production alters/maintains the pH of the  
204 bacterial cytosol when grown in acidic media. *M. kansasii::EV* or *M.kansasii::Rv3377-78c* were  
205 stained with carboxyfluorescein diacetate succinimidyl ester (CFSE) to measure their  
206 intracellular pH while monitoring their growth in different pH-adjusted 7H9 broth (pH 4.0, 4.8,  
207 5.0, 5.2, 5.4, 6.0, 6.7, 7.2) overnight (Fig. 5). Lower initial pH of the media was associated with  
208 lowering intracellular pH over the experimental timeframe, as expected. Importantly, we  
209 observed the expected growth advantage with 1-TbAd production at lower pH (5.0), but there  
210 was no apparent intracellular pH difference between *M. kansasii* strains at this or any pH. Thus,  
211 1-TbAd production does not aid *M. kansasii* growth at low pH by maintaining the pH of the bulk  
212 intracellular milieu, suggesting the growth advantage is provided by countering the effect of  
213 low pH in a specific region of the cell.

214

### 215 **1-TbAd production enhances establishment of *M. kansasii* lung infection and survival in** 216 **alveolar macrophages.**

217 1-TbAd is hypothesized to promote virulence of *M. tuberculosis* by countering  
218 phagosome acidification, enhancing survival of the pathogen *in cellulo* (19, 28, 29). We  
219 therefore wished to test the virulence of *M. kansasii::Rv3377-78c*. In C57Bl/6 mice, *M.*

220 *tuberculosis* expands in a logarithmic scale within the early course of infection. In sharp  
221 contrast, *M. kansasii* remains at its initial levels of infection, suggesting it is a good model for  
222 acquisition-of-virulence studies within the mouse (3). As a measure of virulence, we  
223 hypothesized that the pulmonary bacterial load of *M. kansasii* in mice would be enhanced with  
224 1-TbAd production. During pilot experiments, we infected mice with *M. kansasii*::EV and *M.*  
225 *kansasii*::*Rv3377-78c* through aerosolization, and infections with either strain resulted in a  
226 pulmonary burden within one log of the initial infection up to day 42, with no clear differences  
227 between both groups with the sample sizes used (Sup. Fig. 3).

228

229         Despite repeated attempts to standardize the inoculum, we consistently noted a higher  
230 number of 1-TbAd-producing *M. kansasii*::*Rv3377-78c* one day after aerosol infection when  
231 compared with *M. kansasii*::EV (not shown). To test if *Rv3377c-Rv3378c* was altering the dose  
232 administered or instead enhancing establishment or early growth, mice were aerosolized with  
233 *M. kansasii*::EV or *M. kansasii*::*Rv3377-78c* and their lungs were collected and homogenized  
234 shortly (4 hours) after infection and compared to bacterial counts 24 hours after infection (Fig.  
235 6a-b). Equivalent 4-hour CFU counts were observed for *M. kansasii*::EV and *M.*  
236 *kansasii*::*Rv3377-78c*; only the latter multiplied successfully 24 hours later (Fig. 6a). *M.*  
237 *kansasii*::*Rv3377-78c* showed a 1.5-fold increase in numbers from 4 to 24 hours while *M.*  
238 *kansasii*::EV numbers remained equal (Fig. 6b). The experiment was performed three times,  
239 once at a low dose of 100 CFUs/lung and twice at a higher dose of 750 CFU/lung, with *M.*  
240 *kansasii*::*Rv3377-78c* consistently attaining larger numbers by 24 hours post-infection in all  
241 three instances (Sup. Fig. 4).

242

243           We hypothesized that 1-TbAd was enhancing proliferation of *M. kansasii* in the lungs by  
244 promoting survival in resident macrophages. First, using bone marrow-derived macrophages  
245 (BMDMs), we infected with *M. kansasii*::EV or *M. kansasii*::*Rv3377-78c* and collected cell lysates  
246 at 4- and 24-hours post infection: the infections proceeded similarly with both bacteria unlike  
247 what we had observed in mouse lungs *in vivo* (Sup. Fig. 5). Alveolar macrophages are resident  
248 lung macrophages that phagocytose infectious agents entering the lower airways (30). We  
249 assessed whether fitness would be altered in an *ex vivo* infection of murine Alveolar  
250 macrophages. In two independent experiments, *M. kansasii*::*Rv3377-78c* increased in numbers  
251 by CFU counts from 4 to 24 hours post infection, while *M. kansasii*::EV numbers were largely  
252 unchanged and inferior to *M. kansasii*::*Rv3377-78c* after 24 hours (fig. 6c-d). *M.*  
253 *kansasii*::*Rv3377-78c* exhibited a 2.0-fold increase compared to the 1.1-fold increase seen in *M.*  
254 *kansasii*::EV (Fig. 6e). This is consistent with our observations in murine lungs and with the  
255 conclusion that 1-TbAd provides an advantage to *M. kansasii* during the early stages of  
256 pulmonary infection by specifically promoting survival or growth in resident alveolar  
257 macrophages.

258

259 **1-TbAd production does not enhance long-term persistence of *M. kansasii* during mixed lung**  
260 **infections**

261           We validated a translaryngeal infection model wherein WT *M. kansasii* was directly  
262 introduced into the upper respiratory tract (Sup. Fig. 6 and methods) (31). Mice were  
263 monitored for 42 days; bacteria persisted at the same log CFU as the initial infection and the

264 mice did not become overtly sick (Sup. Fig. 6). To test the effect of 1-TbAd in a high-dose  
265 competitive infection, wherein we expected high numbers of bacteria to allow us to see subtle  
266 changes in bacterial burden, we used the translaryngeal infection model to generate a mixed  
267 infection with  $3 \times 10^6$  CFUs of a 1:1 WT *M. kansasii* and *M. kansasii::Rv3377-78c* (Fig. 7a). Lung  
268 homogenates plated on 7H10 plates with and without 50  $\mu\text{g}/\text{ml}$  hygromycin revealed a  
269 statistically significant decrease in the *M. kansasii::Rv3377-78c* to WT *M. kansasii* ratio over  
270 time, with an initial decrease in the proportion of *M. kansasii::Rv3377-78c* in the bacterial  
271 population from 0.48 (week 0) to 0.27 (week 1), stabilizing at that latter proportion over time  
272 (Fig. 7a). These findings show no beneficial effect of 1-TbAd production for *M. kansasii* survival  
273 *in vivo*.

274  
275 C-C chemokine receptor 2 (CCR2) is an essential component for defense in the airways;  
276 *Ccr2*<sup>-/-</sup> mice lose the ability to recruit non-tissue resident immune cells and succumb to *M.*  
277 *tuberculosis* infection (32). We used these mice to test whether the short-term alveolar  
278 macrophage phenotype could be recapitulated in a longer-term *in vivo* setting without the  
279 interference of recruited immune cells in WT mice that might explain the lack of a phenotype in  
280 the previous experiment. We aerosol infected *Ccr2*<sup>-/-</sup> mice with a mixed 1:1 bacterial  
281 suspension of WT *M. kansasii* and *M. kansasii::Rv3377-78c* (Fig. 7b). Interestingly, although WT  
282 *M. kansasii* exhibited a slight increase in numbers over time, *M. kansasii::Rv3377-78c* steadily  
283 decreased within the same period. A statistically significant decrease in the *M.*  
284 *kansasii::Rv3377-78c* to WT *M. kansasii* ratio over time was noted, with a steady, non-  
285 stabilizing decrease in the proportion of *M. kansasii::Rv3377-78c* in the bacterial population

286 (Fig. 7b). With these unexpected results, to be sure that our method of identifying *M.*  
287 *kansasii::Rv3377-78c* (hygromycin resistance) in the mixed infection was valid we compared  
288 hygromycin resistance of *M. kansasii::EV* (sup. Fig 7a) and *M. kansasii::Rv3377-78c* (sup. Fig 7b)  
289 after four weeks *in vivo* from separate aerosol infections. Hygromycin resistance declined by up  
290 to 20% initial levels (sup. Fig 7b); this is clearly less than the 40-70% decline observed in the  
291 proportion of *M. kansasii::Rv3377-78c* during mixed infections (Fig 7). Neither strain appeared  
292 more fit in the mouse in the separate infection (sup. Fig 7c). Thus, 1-TbAd production clearly  
293 did not enhance *M. kansasii* survival in any of these *in vivo* infection models, but on the  
294 contrary may hinder fitness in the long term.

295

## 296 **DISCUSSION**

297 Our results indicate the feasibility of using *M. kansasii* to study the pathoevolution of *M.*  
298 *tuberculosis*. The less virulent non-tuberculous mycobacterium (NTM) species is a suitable  
299 surrogate for the expression of *M. tuberculosis*-specific products, such as 1-TbAd, and can  
300 readily be used *in vitro*, and for *ex vivo* and *in vivo* experimental infection models. We showed  
301 that 1-TbAd led to an improved survival during the first 24 hours of infection when tested *in*  
302 *vivo*, and *ex vivo* in alveolar macrophages, but the isolated addition of 1-TbAd to *M. kansasii*  
303 resulted in impaired persistence in different murine infection models.

304

305 In the current study, we demonstrated that *M. kansasii::Rv3377-78c* produced lipid  
306 species distinct from those seen in *M. kansasii::EV*. Our prior and current data indicated that  
307 transfer of TbAd biosynthesis genes to *M. kansasii* does not promote growth at neutral pH, but

308 confers increased growth in 7H9 media in the more acidic pH range (5.0-5.4) (22). When added  
309 as a pure compound or produced by *M. tuberculosis*, 1-TbAd detectably raises the pH and  
310 swells lysosomes in human macrophages (18, 22). In broad terms, the mechanisms by which  
311 the effects of 1-TbAd are mediated could occur through direct chemical results of  
312 lysosomotropism, or through signalling.

313

314 1-TbAd could act as an amphipathic weak base that penetrates membranes as an  
315 uncharged conjugate base to selectively accumulate in acidic phagolysosomes where proton  
316 capture raises pH and confers a positive charge, trapping the compound and leading to  
317 lysosomal swelling. We did not see clear *Rv3377-Rv3378c*-dependent alkalization of 7H9 broth  
318 which might be explained by compartmentalization: whereas intracellular bacteria are bound in  
319 a small phagosomal compartment of  $10^{-15}$  L, growth in 7H9 media provides a much larger  
320 compartment for 1-TbAd to disperse in if it is physically shed from the bacterium. By a rough  
321 estimate,  $10^{10}$  bacteria-worth of 1-TbAd would be required to change the pH of 1 ml of 7H9  
322 from 5.2 to 5.3, about 10,000 times the concentration of bacteria we inoculate (see  
323 supplementary data calculation). This result suggested that 1-TbAd production provides a pH-  
324 dependent growth advantage intrinsic to the bacterium, separate from but not exclusive to  
325 lysosomal perturbation.

326

327 In phagocyte-free systems, we experimentally tested the hypothesis that the pH-  
328 dependent growth advantage of *M. kansasii* producing 1-TbAd might involve direct contact of  
329 the molecules with bacteria. Overall we found that direct exposure to externally added,

330 protonated 1-TbAd at low and high concentrations did not promote growth as might be  
331 expected of a signaling molecule. Increased growth was selectively observed at low pH (5.1-5.4)  
332 when 1-TbAd was generated through gene transfer and the action of enzymes in the bacterium.  
333 While not fully understood, these divergent outcomes whereby the compartment of origin  
334 controls the protective effect can be explained by the lysosomotropy model. Cytosolic 1-TbAd  
335 would be expected to shed its proton during membrane passage into the periplasm. The lack of  
336 pH control in the cytosol of *M. kansasii::Rv3377-78c* cultured in acidic media suggests that 1-  
337 TbAd does not act as a shield against proton flow into *M. kansasii* cytosol, which is the expected  
338 outcome if membrane penetration is required for the protective effect. These outcomes  
339 indicate that the consistently observed survival advantage could derive from 1-TbAd passage  
340 from the cytosolic membrane into the periplasm, mycolate membrane or surface of *M.*  
341 *kansasii*. 1-TbAd may act on the bacterial population itself by targeting or protecting specific  
342 molecules during exposure to low pH, stopping damage from occurring.

343

344 It is noteworthy that genetic and chemical complementation provide different  
345 information about mycobacterial virulence factors, which in this case might result from the  
346 differential compartmentalization of the molecules. This result also argues that 1-TbAd must  
347 exert its protective effect at a specific location within the bacterial cell or cell wall. Exogenous  
348 1-TbAd may simply not reach this specific location, or not reach the location in an uncharged  
349 conjugate base state. Together with our genetic complementation data, it is clear that  
350 *Rv3377c-Rv3378c*-dependent metabolites including 1-TbAd do not have a direct growth-  
351 promoting effect. Our data also demonstrate that *Rv3377c-Rv3378c*-dependent metabolites



352 protect against acid stress *in vitro*, using mechanisms that are independent of macrophage  
353 function, including lysosomes or activating receptors.

354

355 We did not directly characterize the impact of 1-TbAd on the *M. kansasii* cell envelope  
356 composition, therefore we can formally assign effects to Rv3377c and Rv3378c but cannot  
357 refute the possibility of an indirect pathway for the 1-TbAd effect. It is notable that the overall  
358 lipid profiles examined by TLC were not significantly altered by gene transfer. The Congo Red  
359 retention assay (25) and the retained ability to produce carotenoid pigments (24) and turn  
360 yellow upon light exposure both provide indirect evidence that the overall composition of the  
361 cell membrane has been preserved.

362

363 Another key finding is that the complemented strain fared better than *M. kansasii*::EV in  
364 the initial stages of *in vivo* infection. We subsequently showed that *M. kansasii*::Rv3377-78c  
365 was more fit to thrive inside alveolar macrophages, but not BMDMs within that same  
366 timeframe, demonstrating that the production of 1-TbAd can subvert the first lines of host  
367 defense encountered by the pathogen. This finding is in line with recent findings describing  
368 differential replication potentials for *M. tuberculosis* in BMDMs vs. alveolar macrophages, with  
369 the latter being more permissive than IFN- $\gamma$ - or LPS-activated BMDMs for *M. tuberculosis*  
370 replication (33). It is important to note that the BMDMs used to assess *M. kansasii*::Rv3377-78c  
371 were not activated with IFN- $\gamma$  or LPS. Future work focused alternatively on the host will be  
372 needed to characterize what fundamental differences between different cell types, in different  
373 activation states, play a role in the 1-TbAd response.

374

375 WT *M. kansasii* appeared to have outcompeted *M. kansasii::Rv3377-78c* in low- and  
376 high-dose mixed infection settings in both WT and *Ccr2*<sup>-/-</sup> mice. Therefore, although expression  
377 of *Rv3377c-Rv33778c* conferred a survival benefit to *M. kansasii* in specific *in vitro* and short-  
378 term infection contexts, there may be a drawback to 1-TbAd expression in the non-adapted  
379 mycobacterium for persisting in the murine host. The decrease in proportion of *M.*  
380 *kansasii::Rv3377-78c* with mixed infection is not entirely explained by functional loss of  
381 hygromycin resistance over time *in vivo*, strictly according to our numerical data. We  
382 hypothesize that the burden of constitutive production of 1-TbAd, which sequesters adenosine  
383 molecules, may prevent energy storage in the form of ATP and have a negative impact on long-  
384 term *in vivo* survival for *M. kansasii*. Another consideration is the extent to which mycobacterial  
385 killing is dependent on acid-mediated mechanisms. The intrinsic antacid properties of 1-TbAd,  
386 its tropism for acid compartments, its marked remodeling of lysosomes and the pH-dependent  
387 basis of growth promotion in culture media all point at a selective role in protection against  
388 acid-mediated killing. Therefore, the varied outcomes in the models examined herein might  
389 depend on the extent to which they test acid-dependent killing. One question that remains  
390 unanswered is whether there is a single, predominant mechanism of action for which 1-TbAd  
391 production is mainly conserved in *M. tuberculosis*, or multiple important functions.

392

393 Phenotypes observed after pathogen-specific genetic complementation into non-  
394 pathogenic species provide different information than the more commonly observed loss-of-  
395 function phenotypes observed after deleting genes from pathogens. The latter requires

396 breaking one link in a causal chain and might have rippling downstream effects, if it is not the  
397 final component of a response cascade. Gain of function is a rare phenomenon that occurs only  
398 when the components of a larger pathogen-specific system are fully recapitulated in the non-  
399 pathogen and then tested under conditions in which this system is essential. In this regard, that  
400 biosynthetic genes for 1-TbAd can promote early stage growth in alveolar macrophages was  
401 unexpected, so these data now point to a new direction for mechanistic studies of these genes  
402 in *M. tuberculosis*.

403  
404 To date, the established virulence factors of *M. tuberculosis* are largely conserved  
405 among the NTM, with the exception of a few proteins and lipids like 1-TbAd, Tuberculosis  
406 Necrotizing Toxin (34) and the MoaA1-4 operon (35), aprABC (36) and others. Our data indicate  
407 that 1-TbAd alone does not confer a long-term *in vivo* benefit consistent with *in vitro* and *in vivo*  
408 phenotypic differences between *M. tuberculosis* and *M. kansasii*. Therefore, events of  
409 acquisition of other *M. tuberculosis*-specific and loss of *M. kansasii*-specific effectors are likely  
410 required to recreate an *M. tuberculosis*-like *M. kansasii* mutant strain, or alternatively the  
411 difference is due to the compounding of multiple subtle effects that complement one another.  
412 The possibility that mycobacterial virulence factors manifest their phenotype in a cell-  
413 dependent fashion is consistent with the known transcellular lifestyle of *M. tuberculosis* and  
414 suggests that different host-cell types should be used to detect undiscovered virulence  
415 determinants.

416

417 Viewed in this light, using genetically complemented NTM is therefore useful to single  
418 out the effects of specific elements that contributed to *M. tuberculosis* host adaptation without  
419 producing a clearly hypervirulent NTM. The 1-TbAd family of molecules represents a newly  
420 discovered pathogen-specific collection of compounds that has no clear chemical analog in  
421 other bacterial systems, and their exact mechanisms of action remain elusive. We can conclude  
422 from our study that *Rv3377c-Rv3378c* transfer acts in a eukaryotic cell-free system by a  
423 localized chemical mechanism that involves pH, and that such changes can be determinative of  
424 outcomes in alveolar macrophages at expectedly early time points post-infection. As such,  
425 these molecules may aid in the establishment of infection within the lower respiratory tract.

426

## 427 **MATERIALS AND METHODS**

### 428 **Bacterial strains and culture conditions**

429 *M. kansasii* ATCC 12478 and *M. tuberculosis* H37Rv were grown in Middlebrook 7H9 broth (BD  
430 Difco, MD, USA) as previously described (3). To test the ability of *M. kansasii::Rv3377-78c* to  
431 produce yellow pigment, fully-formed colonies were additionally exposed to white light and  
432 incubated at room temperature for 7 days. Where indicated and to ensure single-cell  
433 suspensions, liquid bacterial cultures were de-clumped by slowly passaging through 5x 22G, 5x  
434 25-G and 3x 26-G needles followed by low-speed centrifugation at 50 g for 5 minutes with  
435 passage through a 5- $\mu$ m filter. To generate *M. kansasii::Rv3377-78c*, a 2.4-kb PCR fragment  
436 spanning *Rv3377c-Rv3378c* was generated using primers BamHI-*Rv3377c-Rv3378c*-F and  
437 HindIII-*Rv3377c-Rv3378c*-R (Sup. Table 1) using high-fidelity Phusion DNA polymerase (New  
438 England Biolabs). The fragment was subsequently digested with BamHI and HindIII (all

439 restriction enzymes from New England Biolabs) and cloned into the episomal plasmid pMV261  
440 with the constitutive mycobacterial *hsp60* promoter and a selective apramycin resistance  
441 marker. The *hsp60-Rv3377c-Rv3378c* fragment was shuttled into the integrative vector pMV306  
442 containing a hygromycin resistance cassette using XbaI and HindIII. All ligations were done using  
443 T4 DNA ligase (Fermentas). The resulting plasmid pMV306::*Hsp60-Rv3377c-Rv3378c* was  
444 verified by Sanger sequencing (Genome Québec) to ensure the absence of frameshift or point  
445 mutations during the cloning process. An unaltered version of pMV306 with a hygromycin  
446 resistance cassette was used to create the empty vector control strain *M. kansasii*::EV.  
447 Following electroporation, *M. kansasii*::EV and *M. kansasii*::*Rv3377-78c* were grown in the  
448 presence of 100 µg/mL hygromycin (Wisent).

449

#### 450 **Detection of cell filtrate adenosine-linked lipids**

451 *M. kansasii*::EV, *M. kansasii*::*Rv3377-78c* and *M. tuberculosis* were grown to mid-log phase and  
452 subsequently incubated with 0.25 µCi/mL radiolabeled [8-<sup>14</sup>C]adenosine (American  
453 Radiolabeled Chemicals) for 14 days. Polar lipid fractions were extracted using  
454 CHCl<sub>3</sub>:CH<sub>3</sub>OH:0.3%NaCl (v/v/v)(22).(37). Extracted lipids were spotted on a TLC Silica Gel 60  
455 (Millipore Sigma) with CHCl<sub>3</sub>:CH<sub>3</sub>OH:H<sub>2</sub>O 10:5:1 (v/v/v) used as the mobile phase solvent. The  
456 radiolabeled signature was developed using Storm 840 PhosphorImager (GE Healthcare) to  
457 visualize adenosine-linked lipids in each lane. [8-<sup>14</sup>C]adenosine 1:100 was used as a no-lipid  
458 staining control. The plate was stained with 5% phosphomolybdic acid reagent (PMA) (Sigma)  
459 and heated briefly using an industrial blow-dryer to visualize the total amounts of lipids loaded  
460 in each lane.

461

462 **HPLC-MS analysis of lipids from cells and supernatant**

463 *M. kansasii*::Rv3377-78c, *M. kansasii*::Empty vector (EV) and *M. kansasii* parent strain were  
464 grown in 30 ml of 7H9 media supplemented with albumin-dextrose-saline (5% Bovine Serum  
465 Albumin Fraction V, 2% anhydrous dextrose and 0.87% sodium chloride) to late log-phase.  
466 Bacterial cell pellet and supernatant were separated by centrifugation at 5000 rpm for 5  
467 minutes. The cell pellet was resuspended in 4 ml of PBS at pH 7.4 and distributed equally into  
468 four 2 ml screw-cap tubes. The cells were pelleted by centrifugation and further resuspended in  
469 1 ml PBS at pH titrated to 7.4, 6.4, 5.5 and 4.5 with hydrochloric acid and incubated for 2 hours  
470 at 37°C. At the end of 2 hours the cell pellet and the PBS supernatant were collected for lipid  
471 extraction. Added 10 volumes (3 ml) of Chloroform/methanol (C/M) at the ratio of 1:2 and  
472 extracted for 1 hour at room temperature. A second extraction under similar conditions was  
473 performed with 3 ml of C/M at the ratio of 1:1. The extracted fractions were pooled and dried  
474 under a stream of nitrogen gas. Lipids from the 1 ml PBS supernatant was extracted using  
475 acidified ethyl acetate by adding 3 µl of 6N HCl and 1.4 ml of ethyl acetate and mixing for 30  
476 minutes in an Orbitron shaker. The mixture was centrifuged at 2000 rpm for 15 minutes to  
477 collect the upper organic phase and dried on to glass under a stream of nitrogen gas at room  
478 temperature, and total lipids were weighed using analytical balance. HPLC-MS separations were  
479 performed as described (17) using equal amount of lipid samples from different experimental  
480 conditions as determined by weight on a Mettler balance.

481

482 **Congo Red uptake assay**

483 Bacterial cultures were grown on Congo Red-containing 7H10 plates for 14 days, scraped into a  
484 15-ml conical tube, washed with water until the supernatant became clear and incubated with  
485 2 ml DMSO for 2 hours (25, 38). Congo Red was measured in the resultant supernatant at A488.  
486 The values were normalized to the dry weight of the pellet to define the Congo Red binding  
487 index.

488

#### 489 **Extracellular pH measurement**

490 For all pH experiments, liquid media was prepared as usual and the pH was equilibrated to 4.0,  
491 4.9, 5.0, 5.1, 5.2, 5.4, 6.0, 6.7 and 7.2 using 2 M HCl or NaOH. OD<sub>600</sub> was adjusted to 0.34 and  
492 222 µl of mid-log phase de-clumped bacteria were added to 15 ml of freshly prepared, pH-  
493 adjusted 7H9 in 150-ml roller bottles (final OD<sub>600</sub> of 0.005). Triplicate cultures were made per  
494 condition (strain and pH) and incubated at 37°C, rolling in the dark. OD<sub>600</sub> was measured every  
495 2-3 days using 2 x 200 µl of culture (technical duplicates) and a Tecan Infinite M200 Pro plate  
496 reader. At days 8 and 17, 1 ml was removed from each culture for centrifugation and recovery of  
497 supernatant, which was stored at 4°C until extracellular pH was read using micro pH  
498 combination electrode (AgCl) (Sigma Aldrich), and Orion Star A111 meter (Thermo Scientific).

499

#### 500 **Synthetic TbAds and chemical complementation**

501 Synthetic 1-TbAd and N<sup>6</sup>-TbAd were produced as described previously (39). Bacterial cultures  
502 were grown to mid-log phase and de-clumped as described above, then inoculated into 96-well  
503 plates in 200 µl pH-adjusted 7H9 containing 1-TbAd, N<sup>6</sup>-TbAd or vehicle (DMSO) control as  
504 indicated. Plates were incubated at 37°C in the dark and OD<sub>600</sub> was measured every one to  
505 three days with a Tecan Infinite M200 Pro plate reader.

506

### 507 **Intracellular pH measurement**

508 Bacterial cultures were grown to mid-log phase and de-clumped as previously described.  $5 \times 10^8$   
509 CFU were pelleted, the supernatant completely removed, and the cells resuspended in 0.3 ml  
510 PBS containing 100  $\mu$ M Carboxyfluorescein diacetate succinimidyl ester (CFDA-SE) (CellTrace™  
511 CFSE, ThermoFisher) for 20 minutes at 37°C, shaking at 150 RPM in the dark. Bacteria were next  
512 diluted with 10 ml of 7H9 and incubated for 4 hours at 37°C, rolling in the dark. A portion of  
513 bacteria was taken during this incubation for lysis in normal saline (0.9% NaCl) by beating with  
514 silica beads (MP Biomedicals, FastPrep-24) to extract free protein-CFSE conjugate to generate a  
515 fluorescence-to-pH standard curve. After 4 hours, bacteria were washed and resuspended in  
516 normal saline to an OD<sub>600</sub> of 0.4. 20  $\mu$ l of bacteria in saline were sub-cultured into 180  $\mu$ l of  
517 freshly prepared, pH-adjusted 7H9 in 96-well plates (opaque-black for fluorescence  
518 (ThermoScientific Nunclon Delta Surface), translucent-colourless for absorbance (Falcon). Lysed  
519 bacteria were plated similarly for the pH standard curve. Immediately, plates were placed in  
520 plate readers (Tecan Infinite M200 Pro) at 37°C, shaking and measuring fluorescence or OD<sub>600</sub>  
521 every 30 minutes. 528-nm fluorescence was measured from 490-nm excitation (pH-sensitive),  
522 and 520-nm fluorescence was measured from 450-nm excitation (pH-insensitive). To calculate  
523 pH, 7H9 background was subtracted for all data first (pH did not alter 7H9 fluorescence). Next,  
524 a standard curve of 490-excitation/450-excitation in relation to 7H9 pH was created from the  
525 CFSE-containing cell lysate. The 490/450 ratios calculated from the culture wells were applied  
526 to the standard curve to determine intracellular pH.

527



## 528 **Murine pulmonary infection**

529 Male and female C57Bl/6 and *Ccr2*<sup>-/-</sup> mice (Jackson Laboratories) were used for experiments.  
530 Mice were approximately 6-16 weeks of age upon infection over all experiments; different  
531 groups were age- and sex-matched. All protocols were approved by independent ethics  
532 oversight at the RI-MUHC and followed the guidelines of the Canadian Council on Animal Care  
533 (CCAC). C57Bl/6 mice were infected through aerosolization (ONARES, NJ, USA) of bacterial  
534 cultures at OD<sub>600</sub> 0.4 for 15 minutes as previously described (3). Alternatively, C57Bl/6 mice  
535 were infected via trans-laryngeal intubation using 50 µl of a high-dose mixed bacterial  
536 suspension containing both wild-type (WT) *M. kansasii* and *M. kansasii*::*Rv3377-78c* at OD<sub>600</sub>  
537 0.2. C57Bl/6 *Ccr2*<sup>-/-</sup> (C-C motif chemokine receptor 2 knockout) mice were infected through  
538 aerosolization of a low-dose mixed suspension at OD<sub>600</sub> 1.0. Mouse lungs were harvested at 4 or  
539 24 hours (early time-points to measure short-term bacterial establishment) and 14, 21, 28, 42  
540 or 56 days post infection (later time-points to measure long-term bacterial persistence) into  
541 1ml 7H9 and homogenized using an Omni Tissue Homogenizer TH (Omni International) at high  
542 speed for 45 seconds. Serial dilutions made in 7H9 liquid media from lung homogenates were  
543 plated on 7H10 plates containing PANTA ± 50 µg/ml hygromycin. Colony-forming units (CFU)  
544 were counted 2 weeks post-plating to determine bacterial burden.

545

## 546 **Murine macrophage isolation**

547 Bone marrow was isolated from C57Bl/6 murine tibiae and femora. Bone marrow-derived  
548 macrophage (BMDMs) were differentiated with recombinant M-CSF (100 U/ml) (Peprotech) for  
549 a period of 7 days as previously described (40), after which they were lifted using 4 ml

550 CellStripper Solution (Corning) and seeded into the appropriate tissue-culture plates. For  
551 alveolar macrophage (AM) isolation, the respiratory tract including the trachea and lungs was  
552 isolated and repeatedly perfused with cold sterile phosphate-buffered saline (PBS) to collect  
553 the cells through bronchoalveolar lavage (BAL). Alveolar macrophages were enriched through  
554 adherence purification to tissue culture-treated 96-well plates over 24 hours, at which point  
555 other cells were washed away. All mammalian cells were cultured in RPMI 1640 media  
556 supplemented with non-essential amino acids, 10 mM HEPES, 10% FBS ±  
557 Penicillin/Streptomycin (Wisent).

558

### 559 **Macrophage infection**

560 Macrophages were seeded into 96-well plates (100,000 cells/200 µl complete RPMI media  
561 without antibiotics). Bacterial cultures were grown to OD<sub>600</sub> 0.2-0.5, clumps were removed to  
562 ensure single-cell suspensions and adjusted in complete RPMI media (without antibiotics) to an  
563 OD<sub>600</sub> 0.01. Macrophages were infected by replacing the media with fresh media containing  
564 bacterial suspension. After 4 hours of infection, the wells were gently washed three times with  
565 PBS to remove extracellular bacteria and fresh complete RPMI media (without antibiotics) was  
566 added to each well. At indicated time points, the plates were spun down at 2,000 g for 5  
567 minutes. Each well was subjected to PBS containing 1% Triton X-100 for 10 minutes at room  
568 temperature to induce macrophage lysis. Following serial dilution and plating, CFUs were  
569 counted on 7H10 plates 2 weeks post-plating to determine bacterial burden.

570

### 571 **Statistical analysis**

572 All calculations and statistical analyses were performed using Microsoft Excel or GraphPad  
573 Prism. Calculations included (1) the ratio of individual 24-hr CFU values/mean 4-hr CFU for  
574 murine lung and macrophage infection assays to determine bacterial proliferation [datapoint =  
575 (24-hr CFU)/(mean 4-hr CFU)] and (2) the proportion of *MKAN::Rv33778c* / total (values paired  
576 from individual mice) in competition assays to determine comparative fitness of WT *M. kansasii*  
577 vs. *M. kansasii::Rv3377-78c* [datapoint = (CFU on 7H10-Hygromycin)/(CFU on 7H10)].

578

### 579 Acknowledgements

580 We would like to thank Dr. Maziar Divangahi and Laura Mendonça for transferring their  
581 knowledge on alveolar macrophages and for providing *Ccr2*<sup>-/-</sup> mice. We would also like to  
582 thank Dr. David Young for assistance with chromatography and figure preparation.

583 This project was funded through the support of an operating CIHR grant FND-148362.

584

### 585 References

- 586 1. Peirs P, Lefevre P, Boarbi S, Wang XM, Denis O, Braibant M, Pethe K, Locht C, Huygen K,  
587 Content J. 2005. Mycobacterium tuberculosis with disruption in genes encoding the  
588 phosphate binding proteins PstS1 and PstS2 is deficient in phosphate uptake and  
589 demonstrates reduced in vivo virulence. *Infect Immun* 73:1898-902.
- 590 2. Dunphy KY, Senaratne RH, Masuzawa M, Kendall LV, Riley LW. 2010. Attenuation of  
591 Mycobacterium tuberculosis functionally disrupted in a fatty acyl-coenzyme A  
592 synthetase gene *fadD5*. *J Infect Dis* 201:1232-9.

- 593 3. Wang J, McIntosh F, Radomski N, Dewar K, Simeone R, Enninga J, Brosch R, Rocha EP,  
594 Veyrier FJ, Behr MA. 2015. Insights on the emergence of *Mycobacterium tuberculosis*  
595 from the analysis of *Mycobacterium kansasii*. *Genome Biol Evol* 7:856-70.
- 596 4. Bloch KC, Zwerling L, Pletcher MJ, Hahn JA, Gerberding JL, Ostroff SM, Vugia DJ, Reingold  
597 AL. 1998. Incidence and clinical implications of isolation of *Mycobacterium kansasii*:  
598 results of a 5-year, population-based study. *Ann Intern Med* 129:698-704.
- 599 5. Johnson MM, Odell JA. 2014. Nontuberculous mycobacterial pulmonary infections. *J*  
600 *Thorac Dis* 6:210-20.
- 601 6. Sheu LC, Tran TM, Jarlsberg LG, Marras TK, Daley CL, Nahid P. 2015. Non-tuberculous  
602 mycobacterial infections at San Francisco General Hospital. *Clin Respir J* 9:436-42.
- 603 7. Ricketts WM, O'Shaughnessy TC, van Ingen J. 2014. Human-to-human transmission of  
604 *Mycobacterium kansasii* or victims of a shared source? *Eur Respir J* 44:1085-7.
- 605 8. Griffith DE, Aksamit T, Brown-Elliott BA, Catanzaro A, Daley C, Gordin F, Holland SM,  
606 Horsburgh R, Huitt G, Iademarco MF, Iseman M, Olivier K, Ruoss S, von Reyn CF, Wallace  
607 RJ, Jr., Winthrop K, Subcommittee ATSM, American Thoracic S, Infectious Disease  
608 Society of A. 2007. An official ATS/IDSA statement: diagnosis, treatment, and prevention  
609 of nontuberculous mycobacterial diseases. *Am J Respir Crit Care Med* 175:367-416.
- 610 9. Fortune SM, Jaeger A, Sarracino DA, Chase MR, Sasseti CM, Sherman DR, Bloom BR,  
611 Rubin EJ. 2005. Mutually dependent secretion of proteins required for mycobacterial  
612 virulence. *Proc Natl Acad Sci U S A* 102:10676-81.
- 613 10. Boon C, Dick T. 2002. *Mycobacterium bovis* BCG response regulator essential for hypoxic  
614 dormancy. *J Bacteriol* 184:6760-7.

- 615 11. Walters SB, Dubnau E, Kolesnikova I, Laval F, Daffe M, Smith I. 2006. The Mycobacterium  
616 tuberculosis PhoPR two-component system regulates genes essential for virulence and  
617 complex lipid biosynthesis. *Mol Microbiol* 60:312-30.
- 618 12. Salah IB, Ghigo E, Drancourt M. 2009. Free-living amoebae, a training field for  
619 macrophage resistance of mycobacteria. *Clin Microbiol Infect* 15:894-905.
- 620 13. Veyrier F, Pletzer D, Turenne C, Behr MA. 2009. Phylogenetic detection of horizontal  
621 gene transfer during the step-wise genesis of *Mycobacterium tuberculosis*. *BMC Evol*  
622 *Biol* 9:196.
- 623 14. Becq J, Gutierrez MC, Rosas-Magallanes V, Rauzier J, Gicquel B, Neyrolles O,  
624 Deschavanne P. 2007. Contribution of horizontally acquired genomic islands to the  
625 evolution of the tubercle bacilli. *Mol Biol Evol* 24:1861-71.
- 626 15. Boritsch EC, Khanna V, Pawlik A, HonorÉ N, Navas VH, Ma L, Bouchier C, Seemann T,  
627 Supply P, Stinear TP, Brosch R. 2016. Key experimental evidence of chromosomal DNA  
628 transfer among selected tuberculosis-causing mycobacteria. *Proceedings of the National*  
629 *Academy of Sciences of the United States of America* 113:9876-81.
- 630 16. Sapriel G, Brosch R. 2019. Shared pathogenomic patterns characterize a new phylotype,  
631 revealing transition towards host-adaptation long before speciation of *Mycobacterium*  
632 *tuberculosis*. *Genome Biol Evol* doi:10.1093/gbe/evz162.
- 633 17. Layre E, Lee HJ, Young DC, Martinot AJ, Buter J, Minnaard AJ, Annand JW, Fortune SM,  
634 Snider BB, Matsunaga I, Rubin EJ, Alber T, Moody DB. 2014. Molecular profiling of  
635 *Mycobacterium tuberculosis* identifies tuberculosinyl nucleoside products of the  
636 virulence-associated enzyme Rv3378c. *Proc Natl Acad Sci U S A* 111:2978-83.

- 637 18. Young DC, Layre E, Pan SJ, Tapley A, Adamson J, Seshadri C, Wu Z, Buter J, Minnaard AJ,  
638 Coscolla M, Gagneux S, Copin R, Ernst JD, Bishai WR, Snider BB, Moody DB. 2015. In vivo  
639 biosynthesis of terpene nucleosides provides unique chemical markers of  
640 *Mycobacterium tuberculosis* infection. *Chem Biol* 22:516-526.
- 641 19. Mann FM, Xu M, Chen X, Fulton DB, Russell DG, Peters RJ. 2009. Edaxadiene: a new  
642 bioactive diterpene from *Mycobacterium tuberculosis*. *J Am Chem Soc* 131:17526-7.
- 643 20. Lau SK, Lam CW, Curreem SO, Lee KC, Lau CC, Chow WN, Ngan AH, To KK, Chan JF, Hung  
644 IF, Yam WC, Yuen KY, Woo PC. 2015. Identification of specific metabolites in culture  
645 supernatant of *Mycobacterium tuberculosis* using metabolomics: exploration of  
646 potential biomarkers. *Emerg Microbes Infect* 4:e6.
- 647 21. David HL. 1974. Carotenoid pigments of *Mycobacterium kansasii*. *Appl Microbiol* 28:696-  
648 9.
- 649 22. Buter J, Cheng TY, Ghanem M, Grootemaat AE, Raman S, Feng X, Plantijn AR, Ennis T,  
650 Wang J, Cotton RN, Layre E, Ramnarine AK, Mayfield JA, Young DC, Jezek Martinot A,  
651 Siddiqi N, Wakabayashi S, Botella H, Calderon R, Murray M, Ehrt S, Snider BB, Reed MB,  
652 Oldfield E, Tan S, Rubin EJ, Behr MA, van der Wel NN, Minnaard AJ, Moody DB. 2019.  
653 *Mycobacterium tuberculosis* releases an antacid that remodels phagosomes. *Nat Chem*  
654 *Biol* 15:889-899.
- 655 23. de Duve C, Trouet A, Campeneere DD, Baurian R. 1978. Liposomes as lysosomotropic  
656 carriers. *Ann N Y Acad Sci* 308:226-34.
- 657 24. Kirti K, Amita S, Priti S, Mukesh Kumar A, Jyoti S. 2014. Colorful World of Microbes:  
658 Carotenoids and Their Applications. *Advances in Biology* 2014:837891.

- 659 25. Jankute M, Nataraj V, Lee OY, Wu HHT, Ridell M, Garton NJ, Barer MR, Minnikin DE,  
660 Bhatt A, Besra GS. 2017. The role of hydrophobicity in tuberculosis evolution and  
661 pathogenicity. *Sci Rep* 7:1315.
- 662 26. Portaels F, Pattyn SR. 1982. Growth of mycobacteria in relation to the pH of the  
663 medium. *Ann Microbiol (Paris)* 133:213-21.
- 664 27. Vandal OH, Nathan CF, Ehrt S. 2009. Acid resistance in *Mycobacterium tuberculosis*. *J*  
665 *Bacteriol* 191:4714-21.
- 666 28. Pethe K, Swenson DL, Alonso S, Anderson J, Wang C, Russell DG. 2004. Isolation of  
667 *Mycobacterium tuberculosis* mutants defective in the arrest of phagosome maturation.  
668 *Proc Natl Acad Sci U S A* 101:13642-7.
- 669 29. Stewart GR, Patel J, Robertson BD, Rae A, Young DB. 2005. Mycobacterial mutants with  
670 defective control of phagosomal acidification. *PLoS Pathog* 1:269-78.
- 671 30. Johnson JD, Hand WL, King NL, Hughes CG. 1975. Activation of alveolar macrophages  
672 after lower respiratory tract infection. *J Immunol* 115:80-4.
- 673 31. Guilbault C, Martin P, Houle D, Boghdady ML, Guiot MC, Marion D, Radzioch D. 2005.  
674 Cystic fibrosis lung disease following infection with *Pseudomonas aeruginosa* in *Cftr*  
675 knockout mice using novel non-invasive direct pulmonary infection technique.  
676 *Laboratory Animals* 39:336-352.
- 677 32. Peters W, Scott HM, Chambers HF, Flynn JL, Charo IF, Ernst JD. 2001. Chemokine  
678 receptor 2 serves an early and essential role in resistance to *Mycobacterium*  
679 *tuberculosis*. *Proc Natl Acad Sci U S A* 98:7958-63.

- 680 33. Huang L, Nazarova EV, Tan S, Liu Y, Russell DG. 2018. Growth of *Mycobacterium*  
681 tuberculosis in vivo segregates with host macrophage metabolism and ontogeny. *The*  
682 *Journal of experimental medicine* 215:1135-1152.
- 683 34. Pajuelo D, Gonzalez-Juarbe N, Tak U, Sun J, Orihuela CJ, Niederweis M. 2018. NAD(+)  
684 Depletion Triggers Macrophage Necroptosis, a Cell Death Pathway Exploited by  
685 *Mycobacterium tuberculosis*. *Cell Rep* 24:429-440.
- 686 35. Levillain F, Poquet Y, Mallet L, Mazeres S, Marceau M, Brosch R, Bange FC, Supply P,  
687 Magalon A, Neyrolles O. 2017. Horizontal acquisition of a hypoxia-responsive  
688 molybdenum cofactor biosynthesis pathway contributed to *Mycobacterium tuberculosis*  
689 pathoadaptation. *PLoS Pathog* 13:e1006752.
- 690 36. Abramovitch RB, Rohde KH, Hsu F-F, Russell DG. 2011. aprABC: a *Mycobacterium*  
691 tuberculosis complex-specific locus that modulates pH-driven adaptation to the  
692 macrophage phagosome. *Molecular microbiology* 80:678-694.
- 693 37. Slayden RA, Barry CE, 3rd. 2001. Analysis of the Lipids of *Mycobacterium tuberculosis*.  
694 *Methods Mol Med* 54:229-45.
- 695 38. Cangelosi GA, Palermo CO, Laurent JP, Hamlin AM, Brabant WH. 1999. Colony  
696 morphotypes on Congo red agar segregate along species and drug susceptibility lines in  
697 the *Mycobacterium avium-intracellulare* complex. *Microbiology* 145 ( Pt 6):1317-24.
- 698 39. Buter J, Heijnen D, Wan IC, Bickelhaupt FM, Young DC, Otten E, Moody DB, Minnaard AJ.  
699 2016. Stereoselective Synthesis of 1-Tuberculosinyl Adenosine; a Virulence Factor of  
700 *Mycobacterium tuberculosis*. *J Org Chem* 81:6686-96.



701 40. Zhang X, Goncalves R, Mosser DM. 2008. The isolation and characterization of murine  
702 macrophages. *Curr Protoc Immunol* Chapter 14:Unit 14 1.

703

#### 704 **SUPPLEMENTAL MATERIAL**

705 **Supplementary Table 1 – Primer list**

706

707 **Supplementary Figure 1 – 1-TbAd production enhances growth at low pH.** *M. kansasii::EV*  
708 (*MKAN::EV*) and *M. kansasii::Rv3377-78c* (*MKAN::Rv33778c*) cultures were inoculated at equal  
709 OD<sub>600</sub> into fresh pH-adjusted 7H9 (using HCl titration) and incubated at 37°C in a rolling  
710 incubator over 17 days. The starting pH of the cultures is indicated above each graph. (a) OD<sub>600</sub>  
711 was monitored every 2-3 days. The data are plotted separately for each of three independently  
712 growing cultures per strain. The data are representative of 5 independent experiments.

713

714 **Supplementary Figure 2 – Chemical complementation with TbAd does not change 7H9 broth**  
715 **pH nor enhance growth.** (a) pH of 7H9 of *M. kansasii* cultures taken one hour after addition of  
716 20 µM TbAd (or 0.2% DMSO control) measured by addition of fluorescein and reading  
717 fluorescence against a standard curve. (b) Additional data for fig. 4 on cultures grown in 7H9  
718 broth set to lower pH (absorbance values are near background).

719

720 **Supplementary Figure 3 – *M. kansasii::EV* and *M. kansasii::Rv3377-78c* infections progress**  
721 **similarly in C57Bl/6 mice.** CFUs were counted from C57Bl/6 mouse lungs isolated at 1-, 21- and  
722 42-days post infection (n=5 lungs/condition/time point). The data are plotted as the median.

723

724 **Supplementary Figure 4 – *M. kansasii* fitness in murine lungs in the first 24 hours after**  
725 **infection.** CFUs were counted from C57Bl/6 mouse lungs isolated at 4- vs. 24-hours post aerosol  
726 infection with *M. kansasii* (n=5-10 lungs/condition/time point). Top row, absolute CFU count  
727 data from independent experiments. Bottom row, 24-hr CFU/mean 4-hr CFU ratio data from  
728 corresponding independent experiments. The data are plotted as the mean  $\pm$  SD. GraphPad  
729 Prism 8.1.2 was used to perform Welch's two-tailed unpaired t-tests where ns = not significant  
730 ( $p>0.05$ ), \* $p<0.05$ , \*\* $p<0.01$ , \*\*\*\* $p<0.0001$ .

731

732 **Supplementary Figure 5 – *M. kansasii*::EV and *M. kansasii*::Rv3377-78c infections progress**  
733 **similarly in BMDMs.** CFUs were counted from C57Bl/6 murine-derived BMDMs infected with  
734 *M. kansasii* 4- and 24-hours post-infection. Top, absolute CFU count data are plotted as the  
735 mean of technical replicates (N=3, 5 and 7 respectively)  $\pm$  SD, individually for three independent  
736 experiments. Bottom, 24-hr CFU/mean 4-hr CFU ratio data is plotted for individual experiments  
737 and pooled (N=15 per condition), shown as the mean  $\pm$  SD. GraphPad Prism 8.1.2 was used to  
738 perform Welch's two-tailed unpaired t-tests (ns, not significant  $p>0.05$ ; \* $p<0.05$ ).

739

740 **Supplementary Figure 6 - high-dose infection with *M. kansasii* persists but does not cause**  
741 **debilitating disease in C57Bl/6 mice.** *M. kansasii* was used to infect C57Bl/6 mice with  $10^6$  and  
742  $10^5$  CFUs. (a) Mice were sacrificed at 1- and 42-days post infection to establish initial and  
743 persistent infectious dose, respectively. (b) Mice were weighed over the 42-day period to assess  
744 change in weight as a proxy for clinical status.

745

746 **Supplementary Figure 7 - *M. kansasii*::EV and *M. kansasii*::Rv3377-78c retain hygromycin**  
747 **resistance in C57Bl/6 mice.** Suspensions of *M. kansasii*::EV (MKAN::EV, panel a) and *M.*  
748 *kansasii*::Rv3377-78c (MKAN::Rv33778c, panel b) were used to infect WT C57Bl/6 mice. Lungs  
749 were isolated at 4-hours and 4-weeks post aerosolization (n=5-10 lung pairs per timepoint).  
750 CFUs were counted on 7H10 plates + PANTA ± hyg50. a-b, mean pulmonary CFUs determined  
751 from plating with or without hyg (solid bars), and percent hyg resistance (+hyg/-hyg x 100%)  
752 (empty bars); points represent data from one mouse and bars denote group mean. c, ratio of  
753 total pulmonary CFUs of 4 weeks over 4 hours; GraphPad Prism 8.1.2 was used to perform  
754 Welch's two-tailed unpaired t-tests where ns = not significant (p>0.05).

755

756 **Supplementary Calculation – Estimation of 1-TbAd amount required to alter 7H9 pH**

757

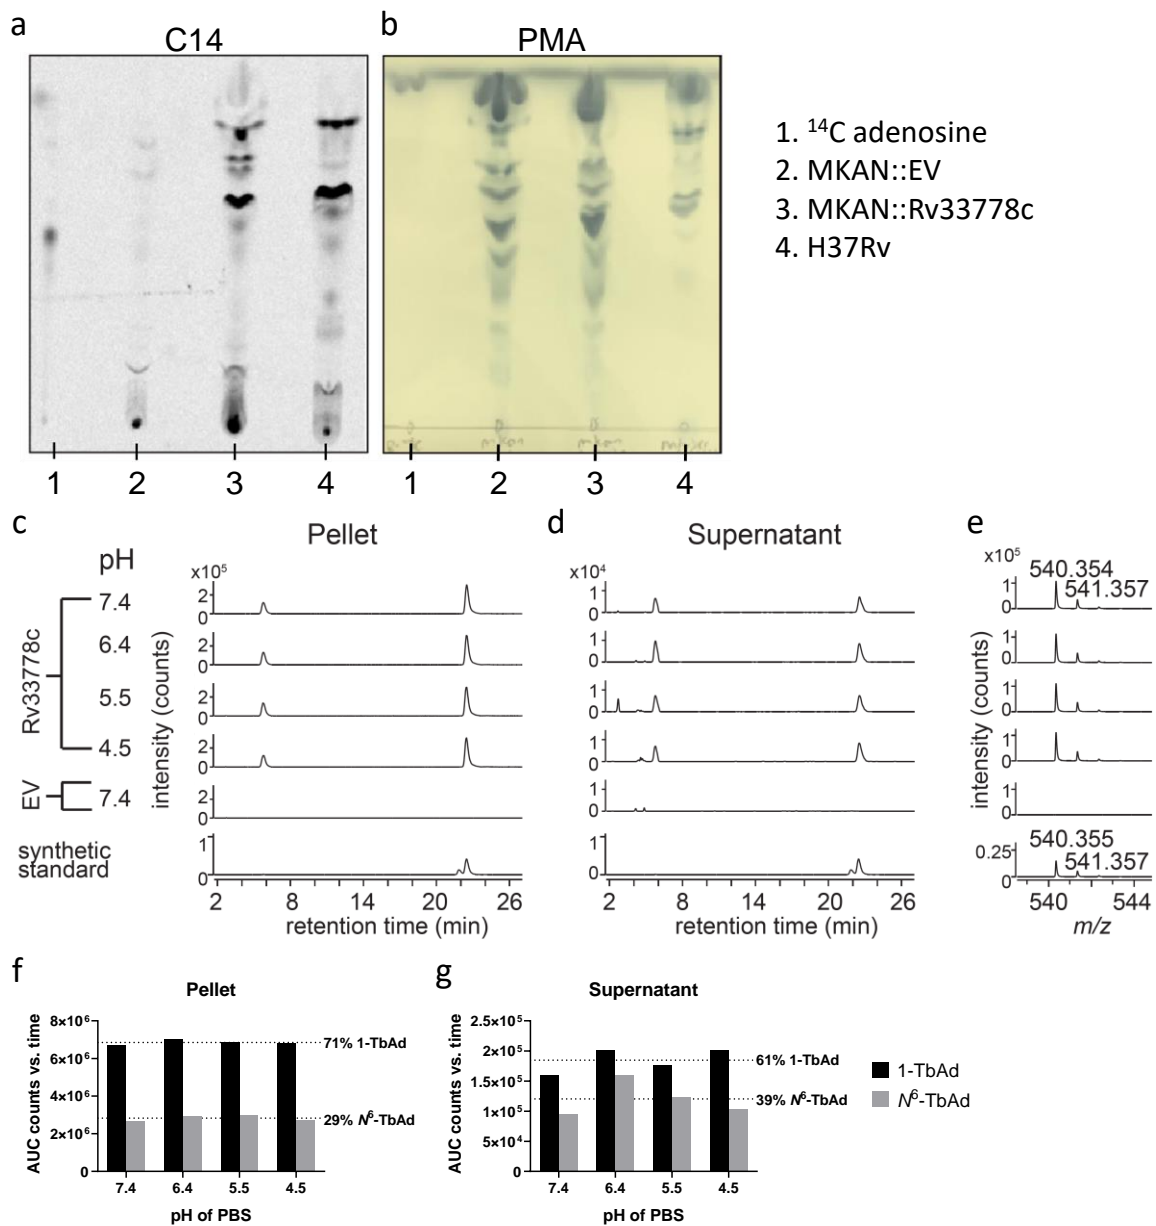

**Figure 1 – *M. kansasii*::Rv3377-78c produces adenosine-linked lipids 1-TbAd and N6-TbAd.** (a) Detection of adenosine-linked lipids extracted from *M. kansasii*::EV (MKAN::EV), *M. kansasii*::Rv3377-78c (MKAN::Rv33778c) and *M. tuberculosis* (H37Rv) through radiolabelling and separation using normal-phase silica thin-layer chromatography. (b) Visualization of migration pattern of total lipids from each sample after staining with 5% phosphomolybdic acid reagent. (c-e) Lipids from *M. kansasii* derived from cell pellets or culture supernatant incubated for two hours at the indicated pH, neutralized and then extracted with organic solvent. Product was analyzed in comparison with a synthetic standard for 1-TbAd, where the slightly later and larger peak corresponds to native 1-TbAd from *Mtb*. (e) The mass spectrum of lipids extracted from 21-22 min for *M. kansasii* show a m/z value that matches with the measured and expected mass of a 1-TbAd standard (21) (f-g) Total extracted lipids expressed as area under curve from counts versus retention time of the extracted ion chromatogram. 1.0  $\mu$ M of synthetic 1-TbAd was used as the standard.

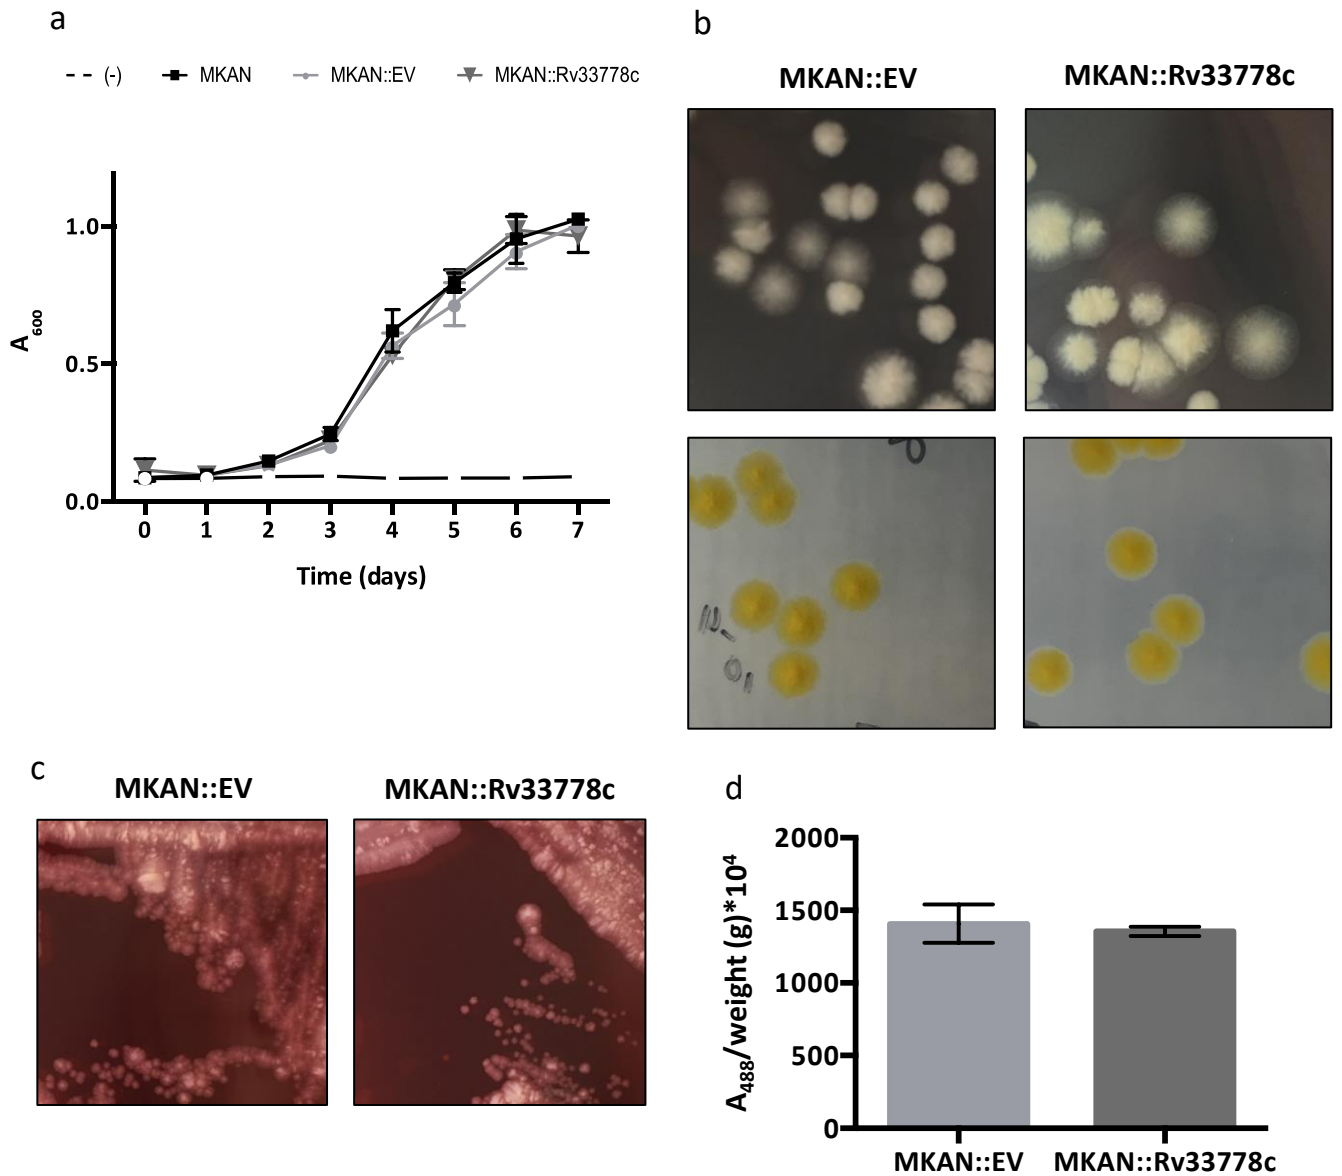

**Figure 2 – 1-TbAd production does not influence the *in vitro* growth characteristics and behaviours of *M. kansasii*.** (a) Comparative OD<sub>600</sub> growth kinetics of wild-type *M. kansasii* (MKAN), *M. kansasii*::EV (MKAN::EV) and *M. kansasii*::Rv3377-78c (MKAN::Rv33778c) at 37°C in 7H9 broth. The data are presented as the mean of technical triplicates ± SD. The data are representative of three independent experiments. (b) Colony morphology in 2 different incubation settings of *M. kansasii*::EV (MKAN::EV) and *M. kansasii*::Rv3377-78c (MKAN::Rv33778c) on 7H10 plates. (c) Colony morphology of *M. kansasii*::EV (MKAN::EV) and *M. kansasii*::Rv3377-78c (MKAN::Rv33778c) on 7H10 plates supplemented with Congo Red. (d) Quantitative analysis of Congo Red dye retention by *M. kansasii*::EV (MKAN::EV) and *M. kansasii*::Rv3377-78c (MKAN::Rv33778c). DMSO extraction was followed by absorbance at 488nm divided by the weight of the dry culture pellet after washing (in grams). The data are plotted as the mean of technical triplicates ± SD. The data are representative of two independent experiments.

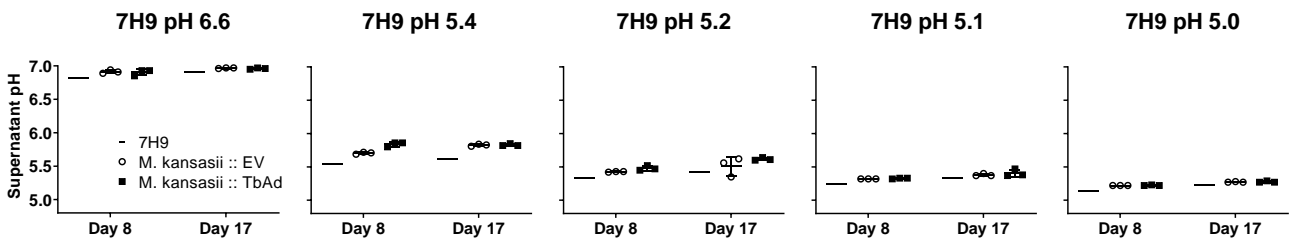

**Figure 3 – 1-TbAd production enhances growth at low pH where growth is associated with culture medium alkalization.**

*M. kansasii*::EV (MKAN::EV) and *M. kansasii*::Rv3377-78c (MKAN::Rv33778c) cultures were inoculated at equal OD<sub>600</sub> into fresh pH-adjusted 7H9 (using HCl titration) and incubated at 37°C in a rolling incubator over 17 days. The starting pH of the cultures is indicated above each graph. The pH of the supernatant was measured at days 8 and 17. The data are presented as the mean of technical triplicates ± SD. The data are representative of three independent experiments.

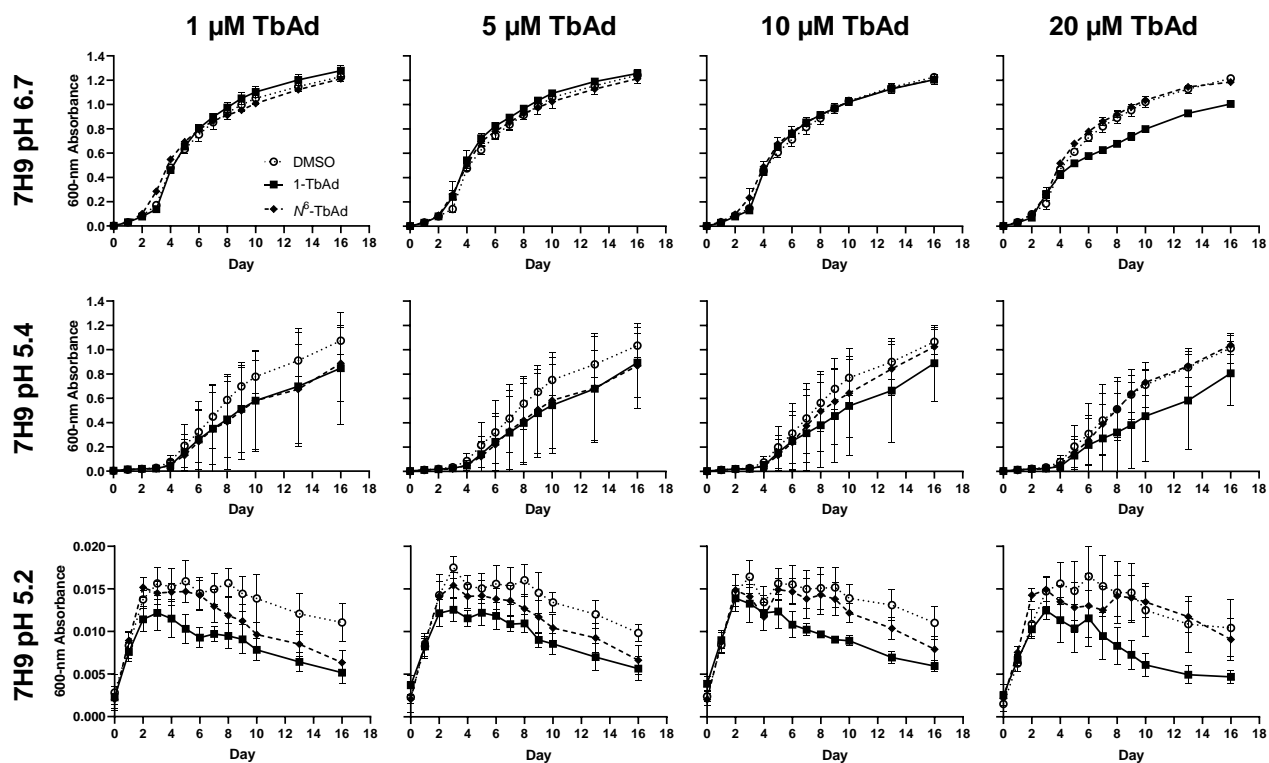

**Figure 4 – Chemical complementation of *M. kansasii* with synthetic TbAd does not promote growth at any pH.** (a) *M. kansasii* WT was inoculated into fresh pH-adjusted 7H9 (using HCl titration) containing the indicated concentration of TbAd isomer or DMSO, and then incubated at 37°C in 96-well plates over 16 days. OD<sub>600</sub> was measured every 1-3 days. The data are presented as the mean of technical quadruplicates ± SD.

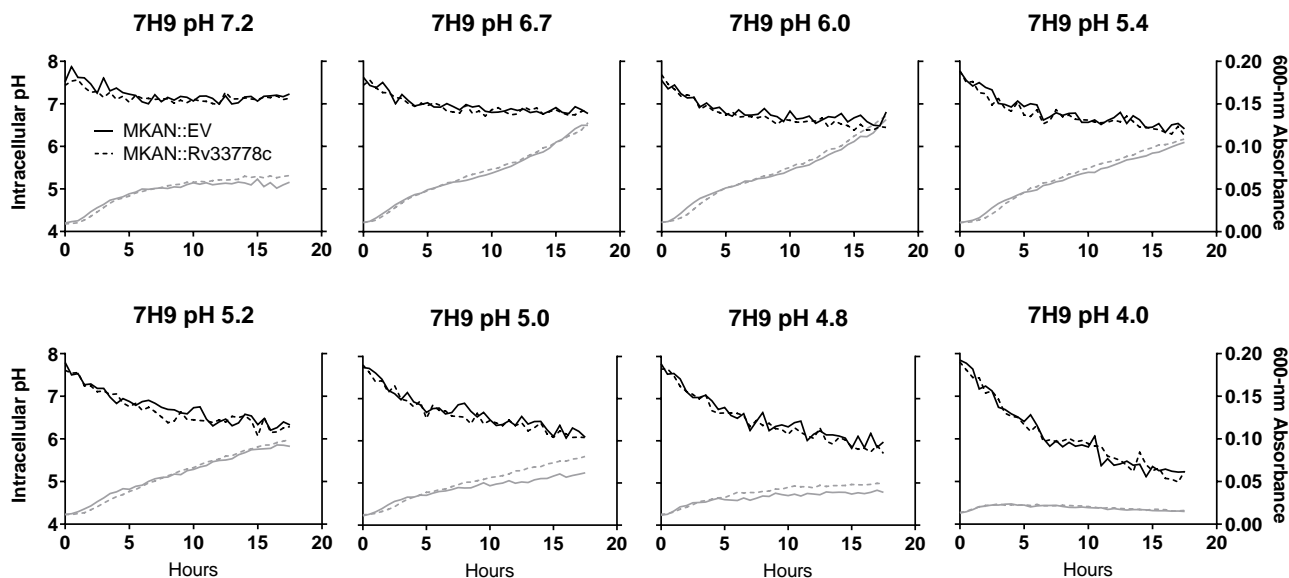

**Figure 5 – 1-TbAd does not alter the intracellular pH of bacteria - *M. kansasii*::EV (MKAN::EV - solid lines) and *M. kansasii*::Rv3377-78c (MKAN::Rv33778c - dashed lines) cultures at equal  $OD_{600}$  were stained with CFSE, inoculated into fresh pH-adjusted 7H9 and incubated shaking at 37°C in 96-well plates placed in the dark. Growth (grey /  $OD_{600}$  measurements) and intracellular pH (black / pH calculated from fluorescence excitation-emission ratios) readings were taken at 30-minute intervals overnight. The data are presented as the median of technical triplicates. Data are representative of 5 independent experiments.**



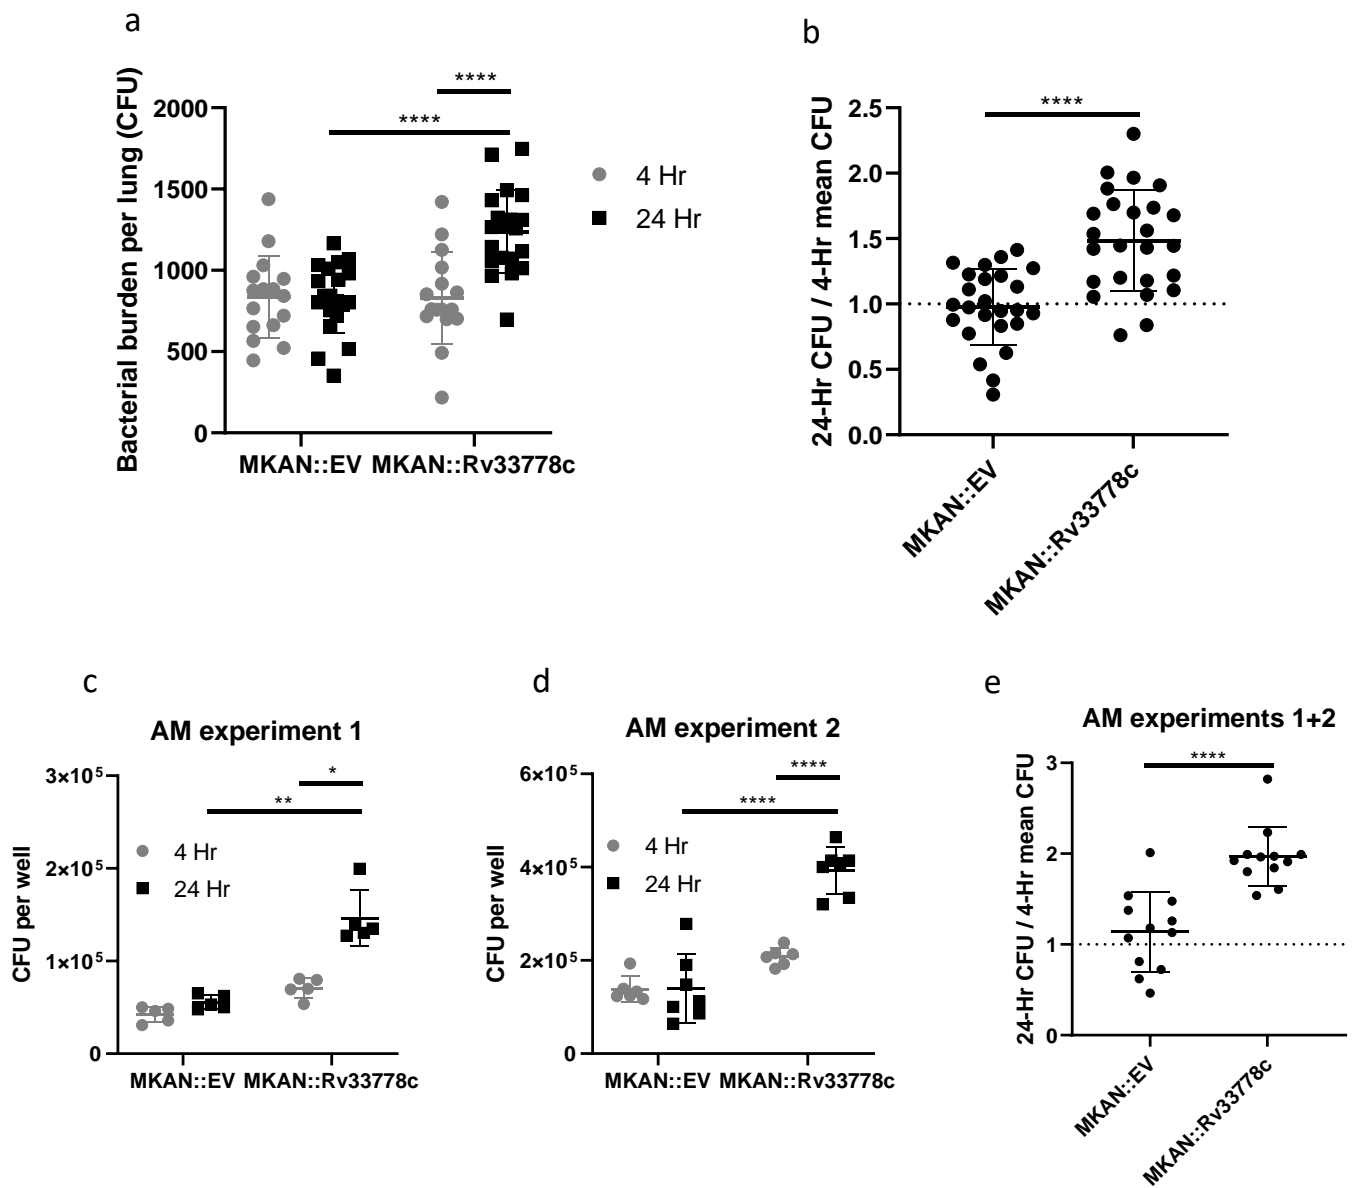

**Figure 6 – 1-TbAd enhances the initial establishment of pulmonary infection.** (a-b) CFUs were counted from C57Bl/6 mouse lungs isolated at 4- vs. 24-hours post aerosol infection with *M. kansasii*::EV (MKAN::EV) or *M. kansasii*::Rv3377-78c (MKAN::Rv33778c) (n=20 lungs/condition/time point). (a) Absolute CFU count data are pooled from two independent experiments with similar initial inoculum. (b) 24-hr CFU/mean 4-hr CFU ratio data were pooled from three independent experiments (n=21-25 lungs/condition/time point). (c-e) CFUs were counted from C57Bl/6 murine-derived AMs at 4- and 24-hours after *ex vivo* *M. kansasii* infection. (c-d) Absolute CFU count data from two independent experiments (N=5 and 7 replicate wells containing infected AMs, respectively, per condition per timepoint). (e) 24-hr CFU/mean 4-hr CFU ratio data pooled from two independent experiments (N=12 per condition). The data are plotted as the mean  $\pm$  SD. GraphPad Prism 8.1.2 was used to perform Welch's two-tailed unpaired t-tests where \*p<0.05, \*\*p<0.01, \*\*\*\*p<0.0001.

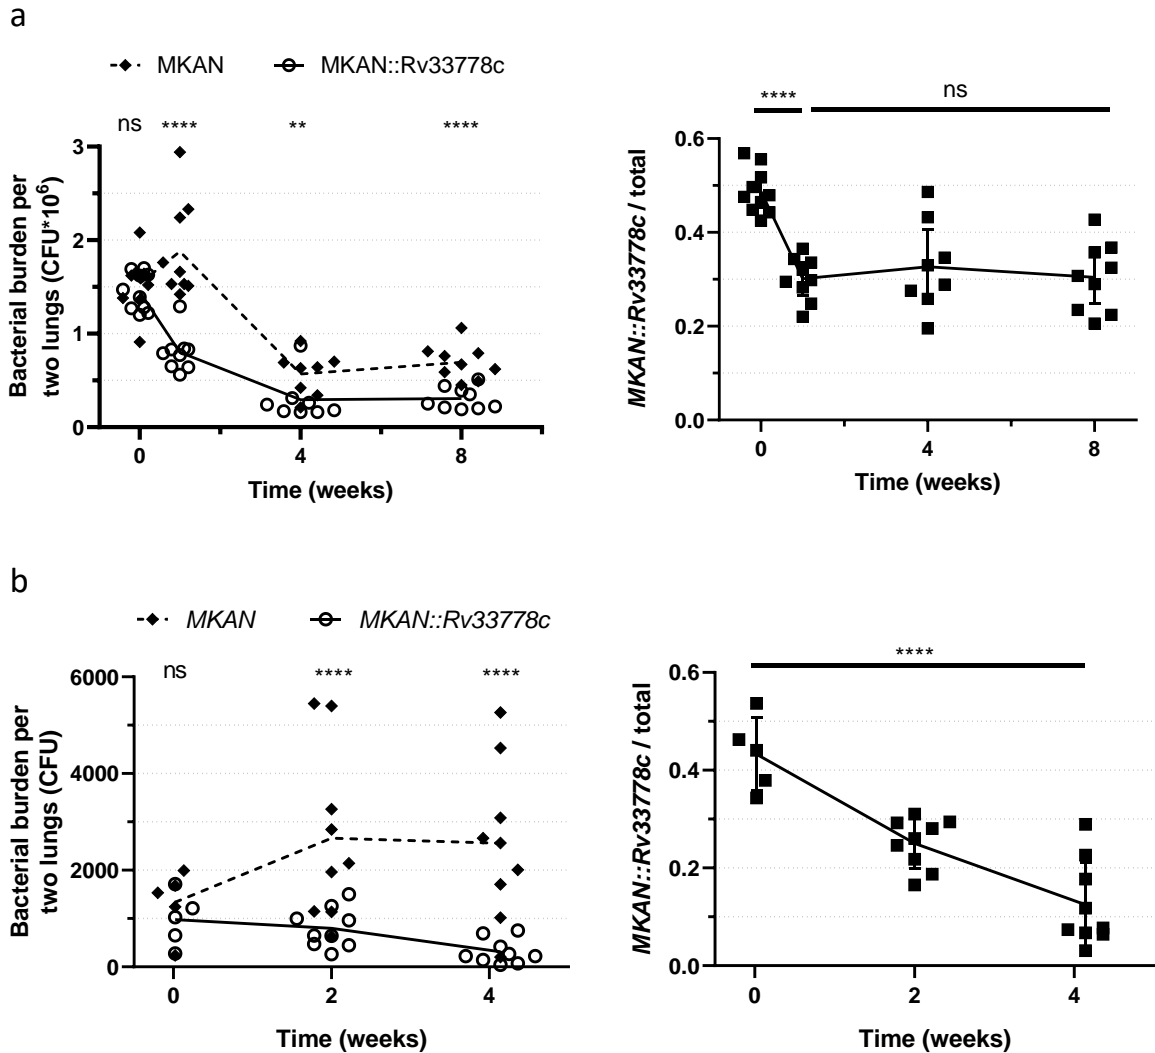

**Figure 7 – 1-TbAd production hinders long-term bacterial growth.** (a-b) Mixed 1:1 bacterial suspensions of WT *M. kansasii* (MKAN) and *M. kansasii*::Rv3377-78c (MKAN::Rv33778c) were used to infect (a) WT C57Bl/6 mouse lungs isolated at 1, 7, 28 and 56 days post high-dose trans-laryngeal intubation (n=8-10 lung pairs per timepoint) or (b) *Ccr2*<sup>-/-</sup> C57Bl/6 mouse lungs isolated at 0, 14 and 29 days post aerosolization (n=5-9 lung pairs per timepoint). CFUs were counted on 7H10 plates + PANTA ± hyg50. The graphs on the right represent the proportion of *M. kansasii*::Rv3377-78c over the total number of bacteria (MKAN + MKAN::Rv33778c) per mouse per timepoint. The raw data (left) and proportions (right) are plotted as individual datapoints (± SD for proportions only). GraphPad Prism 8.1.2 was used to perform the ratio paired t-test (ratio per timepoint/left) and ordinary one-way ANOVA (proportions over time/right).
