# Supplementary material for: Heterologous production of 1-tuberculosinyladenosine in Mycobacterium kansasii models pathoevolution towards the transcellular lifestyle of Mycobacterium tuberculosis
Source: bioRxiv or medRxiv preprint supplement (doi:10.1101/2020.04.25.060590), 2020-09-19
Supplement: Supplementary file [file media-1.pdf]

Estimation for amount of *M. kansasii::Rv3377-78c* required to produce enough 1-TbAd to detectably raise the pH of 1 ml of 7H9 :

Assumptions:

- negligible buffering from 7H9
- pH change from 5.2 to 5.3
- Every 1-TbAd molecule can capture one proton (no intermediate equilibrium)
- *M. tuberculosis* contains up to  $7 \times 10^{-17}$  g of 1-TbAd in one cell (22); assume *M. kansasii::Rv3377-78c* contains the same amount and that all of it is available for neutralization.

1-TbAd is 540 g/mol. Therefore, one cell contains  $1.30 \times 10^{-19}$  mol 1-TbAd. (alternatively put,  $1.30 \times 10^{-19}$  mol  $\times 6.02 \times 10^{23}$  molecules/mol = 78,300 molecules of 1-TbAd per cell). For a pH change of 5.2 to 5.3, the difference in number of H<sup>+</sup> ions is  $(10^{-5.3} \text{ M}) - (10^{-5.2} \text{ M}) = 1.30 \times 10^{-6} \text{ M}$  of H<sup>+</sup>. For 1 ml of solution, that is  $1.30 \times 10^{-9}$  moles of H<sup>+</sup>. Therefore, the number of bacteria needed to change the pH from 5.2 to 5.3 in 1 ml is  $(1.30 \times 10^{-9} \text{ mol}) / (1.30 \times 10^{-19} \text{ mol/cell}) = 10^{10}$  bacteria. This is an OD<sub>600</sub> of roughly 100.
