# Supplementary material for: Heterologous production of 1-tuberculosinyladenosine in Mycobacterium kansasii models pathoevolution towards the transcellular lifestyle of Mycobacterium tuberculosis
Source: bioRxiv or medRxiv preprint supplement (doi:10.1101/2020.04.25.060590), 2020-09-19

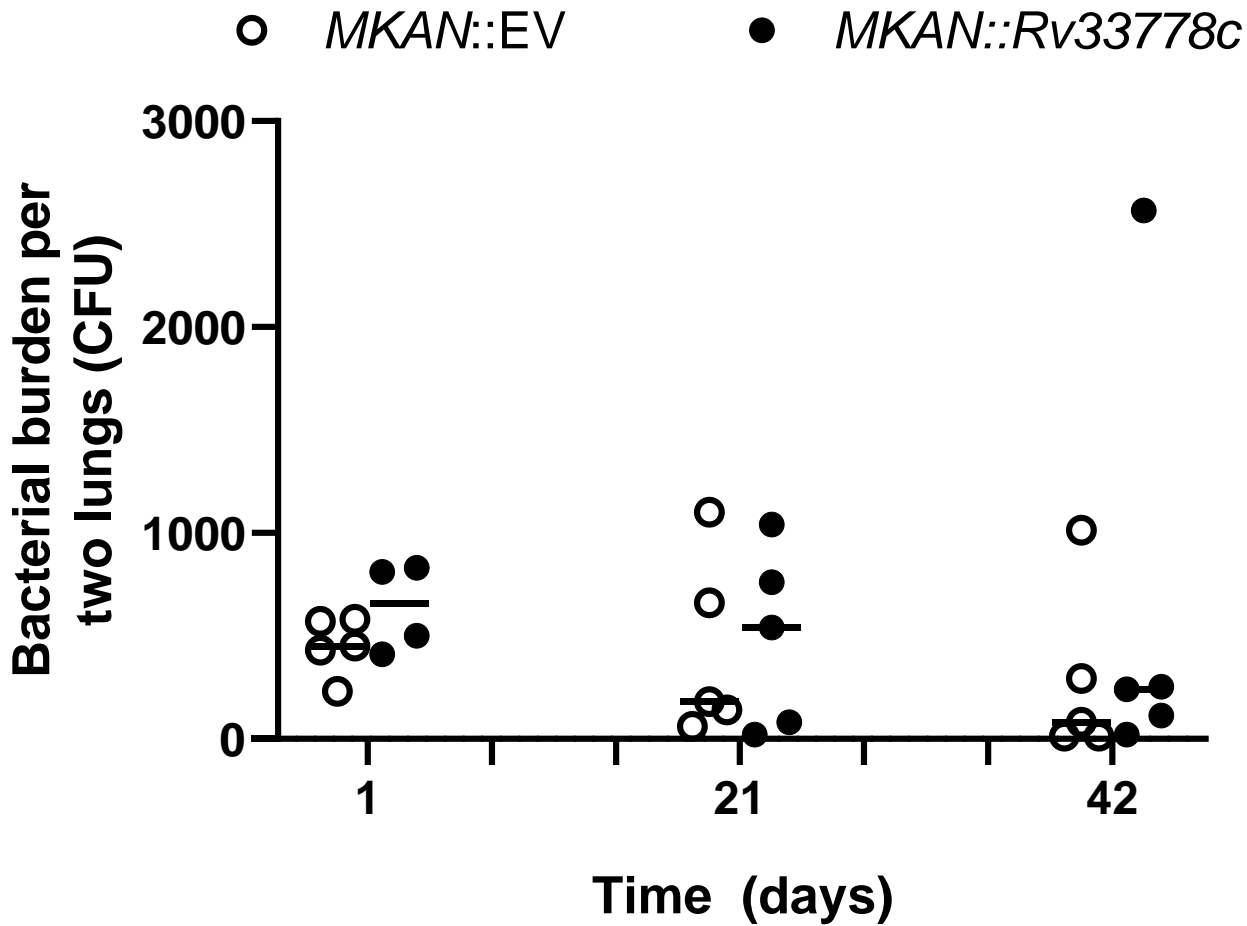

Supplement: Supplementary file [file media-4.pdf]
