# Supplementary material for: Heterologous production of 1-tuberculosinyladenosine in Mycobacterium kansasii models pathoevolution towards the transcellular lifestyle of Mycobacterium tuberculosis
Source: bioRxiv or medRxiv preprint supplement (doi:10.1101/2020.04.25.060590), 2020-09-19
Supplement: Supplementary file [file media-9.pdf]

| <b>Primer name</b>          | <b>Primer sequence</b>          | <b>Use</b>        |
|-----------------------------|---------------------------------|-------------------|
| <b>BamHI-Rv3377-78c-F</b>   | CGGGATCCATGAAGCTTGGTTAGCGAAAAAG | Cloning           |
| <b>HindIII-Rv3377-78c-R</b> | CCAAGCTTTCATTGGTTACTCTCATCGACC  | Cloning           |
| <b>gDNA-Rv3377c-check-F</b> | TCGAGCACAGCCTATGACAC            | Genotyping        |
| <b>gDNA-Rv3377c-check-R</b> | ACCGATCCATTTGTCTCTCTG           | Genotyping        |
| <b>gDNA-Rv3378c-check-F</b> | CACGAGGTCCACGTTCTTTT            | Genotyping        |
| <b>gDNA-Rv3378c-check-R</b> | CAACCCACACCGAAACTCT             | Genotyping        |
| <b>Rv3377-78cSeq-F1</b>     | GCCTTTGAGTGAGCTGATACC           | Sanger sequencing |
| <b>Rv3377-78cSeq-F2</b>     | GCTGGTTTCACCTCGAATG             | Sanger sequencing |
| <b>Rv3377-78cSeq-F3</b>     | GTCATTTCCGGCCAAAC               | Sanger sequencing |
| <b>Rv3377-78cSeq-F4</b>     | CTTGCGTACATCTCATCGA             | Sanger sequencing |
| <b>Rv3377-78cSeq-R1</b>     | GATAATCTCTCTCCGCGTG             | Sanger sequencing |
| <b>Rv3377-78cSeq-R2</b>     | CTTATTCGACGTGAGGCTG             | Sanger sequencing |
| <b>Rv3377-78cSeq-R3</b>     | CATCGTAGGCCACACTTGTG            | Sanger sequencing |
| <b>Rv3377-78cSeq-R4</b>     | CTGTCGTTACGGCTCTAG              | Sanger sequencing |
| <b>qMKANSigA-F</b>          | CGGAGAAGGTGCTCGAAATC            | qRT-PCR           |
| <b>qMKANSigA-R</b>          | TGGTCTGGTCCAGCGAGATC            | qRT-PCR           |
| <b>qRv3377c-F</b>           | CAAGCTCTGGCGCATTGG              | qRT-PCR           |
| <b>qRv3377c-R</b>           | GATCTGCGCCGACAAGGA              | qRT-PCR           |
| <b>qRv3378c-F</b>           | CAACGATGCGGCTGAGTCT             | qRT-PCR           |
| <b>qRv3378c-R</b>           | TTACCATGCGTTTCGTTCCA            | qRT-PCR           |
